# Supplementary material for: Highly regioselective palladium-catalysed oxidative allylic C–H carbonylation of alkenes
Source: Royal Society of Chemistry journal article supplement (doi:10.1039/c1cc15781g), 2011-01-01

## Supporting Information

# Highly Regioselective Palladium-Catalysed Oxidative Allylic C-H Carbonylation of Alkenes\*

Huoji Chen, Congbi Cai, Xiaohang Liu, Xianwei Li and Huanfeng Jiang\*

School of Chemistry and Chemical Engineering, South China University of  
Technology, Guangzhou 510640, P. R. China

Fax: (+86)20-8711-2906

E-mail: [jianghf@scut.edu.cn](mailto:jianghf@scut.edu.cn)

## List of Contents

|                                                |     |
|------------------------------------------------|-----|
| <b>A. General method</b> -----                 | S2  |
| <b>B. General procedure</b> -----              | S3  |
| <b>C. Analytical data for compound 2</b> ----- | S4  |
| <b>D. Mechanistic studies</b> -----            | S10 |
| <b>E. References</b> -----                     | S12 |
| <b>G. NMR Spectra</b> -----                    | S13 |

## A. General method

$^1\text{H}$  and  $^{13}\text{C}$  NMR spectra were recorded on BRUKER DRX-400 spectrometer using  $\text{CDCl}_3$  as solvent and TMS as an internal standard. Gas chromatograph mass spectra were obtained with a SHIMADZU model GCMS-QP 5000 spectrometer. HRMS was carried out on a MAT 95XP (Thermo).

### 1. Typical reaction procedure for the synthesis of alkenes 1.<sup>1</sup>

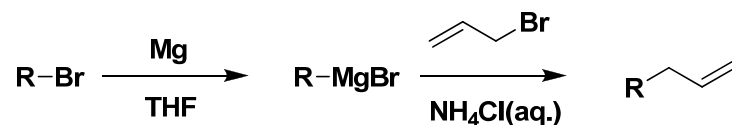

R = Ar

2. The deuterium-labeled substrates *d,d*-1c and *d*-1c were synthesized from  $\text{AlLiD}_4$  according to a previously reported literature.<sup>1</sup>

### 3. Optimization of Reaction Conditions

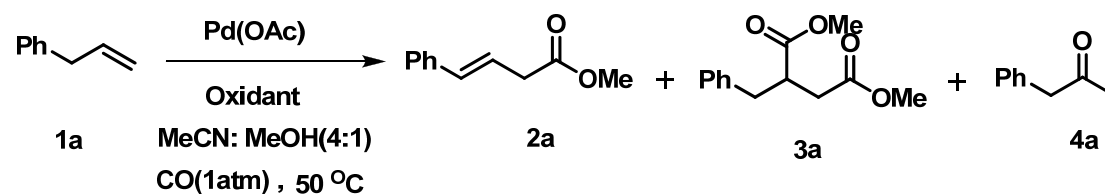

| Entry | Ratio of the Oxidant      | Yield (%) <sup>[b]</sup> |    |    |
|-------|---------------------------|--------------------------|----|----|
|       |                           | 2a                       | 3a | 4a |
| 1     | BQ(2.0 eq.)/ DDQ(0.5 eq.) | 82                       | 3  | 5  |
| 2     | BQ(1.5 eq.)/ DDQ(0.5 eq.) | 13                       | 28 | 11 |
| 3     | BQ(1.0 eq.)/ DDQ(0.5 eq.) | 8                        | 77 | 3  |
| 4     | BQ(1.0 eq.)/ DDQ(1.0 eq.) | 22                       | 3  | 38 |
| 5     | BQ(1.0 eq.)/ DDQ(1.5 eq.) | 14                       | 0  | 53 |

## 4. Substrates

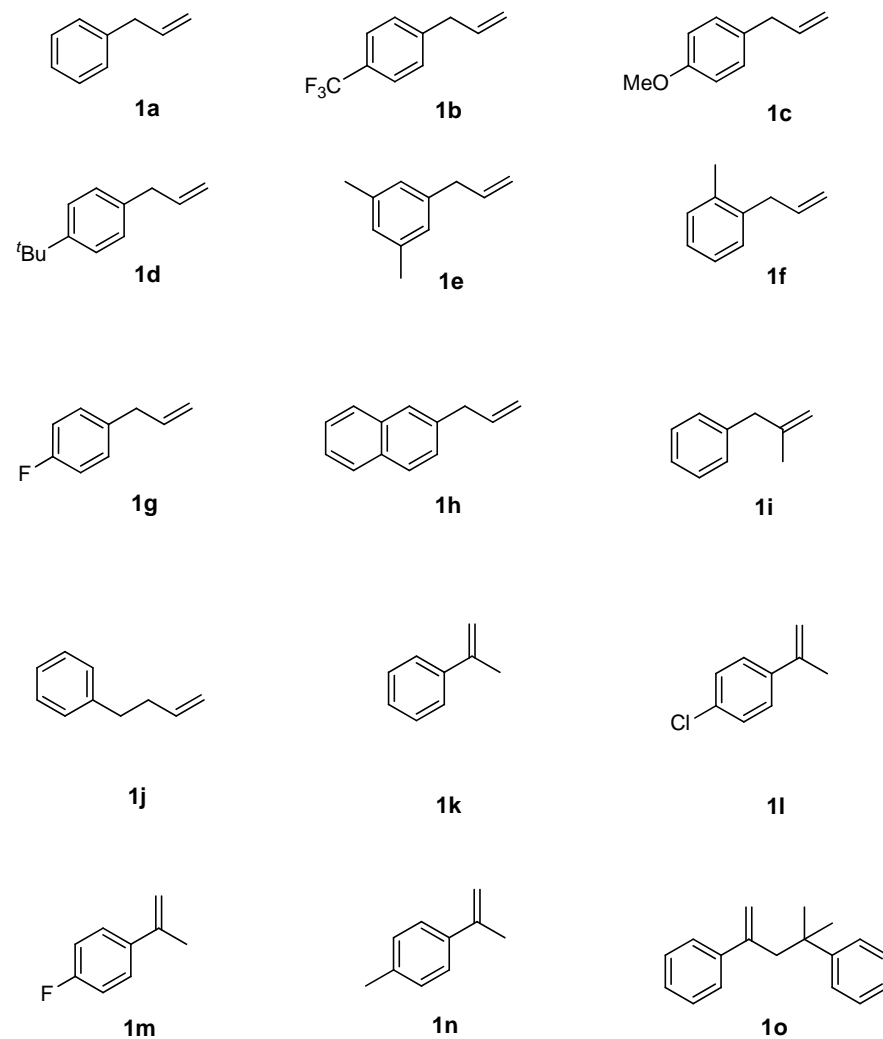

## B. General Procedure

**General procedure for direct carbonylation of allylic C-H bond with alkenes 1.** Pd(OAc)<sub>2</sub> (0.03 mol, 6.7 mg), BQ (0.6 mmol, 64.8 mg) and DDQ (0.15 mmol, 34.1 mg) were mixed with alcohol (0.5 ml)/acetonitrile (2 ml) in a glass vial or round-bottom flask equipped with a magnetic stirring bar. Then, alkene **1** was added. The mixture was stirred under a CO atmosphere (1atm) at 50 °C for 24 h. After cooling down to room temperature and concentrating in vacuum, the residue was purified by flash chromatography on silica gel to obtain the desired products **2** by using light petroleum ether/ethyl acetate (10:1, v/v) as eluent.

### C. Analytical data for compound 2.

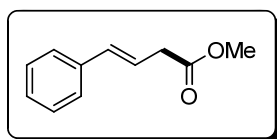

**Methyl (*E*)-4-phenyl-3-butenolate (2a)<sup>2</sup>**, colorless oil.

<sup>1</sup>H NMR (CDCl<sub>3</sub>, 400 MHz) δ 3.25 (dd, *J* = 1.3, 7.0 Hz, 2H), 3.71 (s, 3H), 6.26-6.33 (m, 1H), 6.48 (d, *J* = 15.9 Hz, 1H), 7.22-7.38 (m, 5 H);

<sup>13</sup>C NMR (CDCl<sub>3</sub>, 100 MHz) δ □ 38.2, 51.9, 121.7, 126.3, 127.6, 128.6, 133.5, 136.8, 172.0 ppm.

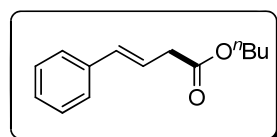

**Butyl (*E*)-4-phenyl-3-butenolate (2a')<sup>2</sup>**, colorless oil.

<sup>1</sup>H NMR (CDCl<sub>3</sub>, 400 MHz) δ 0.94 (t, 3H), 1.36-1.42 (m, 2 H), 1.57-1.65 (m, 2 H), 3.24 (d, *J* = 6.8 Hz, 2H), 4.12 (t, 3H), 6.28-6.34 (m, 1H), 6.49 (d, *J* = 16.0 Hz, 1H), 7.23-7.38 (m, 5 H);

<sup>13</sup>C NMR (CDCl<sub>3</sub>, 100 MHz) δ □ 13.7, 19.1, 30.7, 38.5, 64.7, 121.9, 126.3, 127.5, 128.5, 133.3, 136.9, 171.7 ppm.

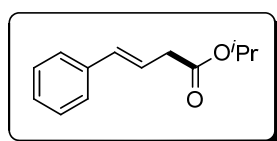

**Isopropyl (*E*)-4-phenyl-3-butenolate (2a'')<sup>2</sup>**, colorless oil.

<sup>1</sup>H NMR (CDCl<sub>3</sub>, 400 MHz) δ 1.18 (d, 6H), 3.13 (d, 2 H), 4.94-5.0 (m, 1 H), 6.18-6.26 (m, 1H), 6.41 (d, *J* = 16.0 Hz, 1H), 7.11-7.30 (m, 5 H);

<sup>13</sup>C NMR (CDCl<sub>3</sub>, 100 MHz) δ □ 21.8, 38.8, 68.1, 122.1, 126.3, 127.5, 128.5, 133.2, 137.0, 171.1 ppm.

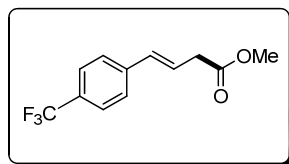

**Methyl (*E*)-4-(4-trifluoromethylphenyl)-3-butenolate (2b)**<sup>10</sup>, colorless oil.

<sup>1</sup>H NMR (CDCl<sub>3</sub>, 400 MHz) δ 3.29 (d, 2H), 3.73 (s, 3 H), 6.36-6.44 (m, 1H), 6.53 (d, *J* = 16.0 Hz, 1H), 7.46 (d, *J* = 8.0 Hz, 2 H), 7.56 (d, *J* = 8.0 Hz, 5 H);

<sup>13</sup>C NMR (CDCl<sub>3</sub>, 100 MHz) δ □ 37.151.0, 123.5, 124.5(quartet), 127.8, 128.1, 129.9, 131.2, 139.2170.6 ppm.

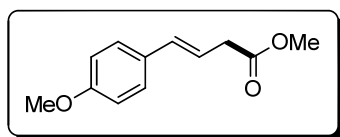

**Methyl (*E*)-4-(4-methoxyphenyl)-3-butenolate (2c)**<sup>2</sup>, colorless oil.

<sup>1</sup>H NMR (CDCl<sub>3</sub>, 400 MHz) δ 3.23 (dd, *J* = 1.3, 7.0 Hz, 2H), 3.71 (s, 3H), 3.80 (s, 3 H), 6.11-6.19 (m, 1H), 6.43 (d, *J* = 15.9 Hz, 1H), 6.84 (d, *J* = 8.8 Hz, 2H); 7.30 (d, *J* = 8.8 Hz, 2H);

<sup>13</sup>C NMR (CDCl<sub>3</sub>, 100 MHz) δ □ 38.2, 51.9, 55.3, 114.0, 119.4, 127.5, 129.7, 132.9, 159.2, 172.2 ppm.

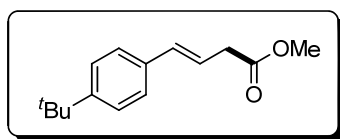

**Methyl (*E*)-4-(4-*tert*-butylphenyl)-3-butenolate (2d)**<sup>2</sup>, colorless oil.

<sup>1</sup>H NMR (CDCl<sub>3</sub>, 400 MHz) δ 1.31 (s, 9H), 3.24 (d, *J* = 7.1 Hz, 2H), 3.71 (s, 3 H), 6.21-6.29 (m, 1H), 6.47 (d, *J* = 15.9 Hz, 1H), 7.32 (d, 4H);

<sup>13</sup>C NMR (CDCl<sub>3</sub>, 100 MHz) δ □ 31.3, 34.6, 38.3, 51.9, 120.9, 125.5, 126.0, 133.2, 134.1, 150.7, 172.1 ppm.

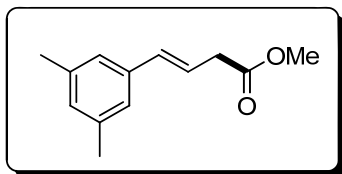

**Methyl (*E*)-4-(3,5-dimethylphenyl)-3-butenolate (2e)**, colorless oil.

$^1\text{H}$  NMR ( $\text{CDCl}_3$ , 400 MHz)  $\delta$  2.30 (s, 6H), 3.23 (d,  $J = 7.0$  Hz, 2H), 3.71 (s, 3 H), 6.22-6.30 (m, 1H), 6.42 (d,  $J = 15.9$  Hz, 1H), 6.88 (s, 1H), 6.99 (s, 2H);

$^{13}\text{C}$  NMR ( $\text{CDCl}_3$ , 100 MHz)  $\delta$  21.2, 38.3, 51.9, 121.2, 124.2, 129.3, 133.6, 136.7, 138.0, 172.1 ppm.

HRMS EI ( $m/z$ ): calcd for  $\text{C}_{13}\text{H}_{16}\text{O}_2$ , 204.1155; found, 204.1150.

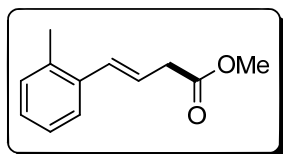

**Methyl (*E*)-4-(2-methylphenyl)-3-butenolate (2f)**<sup>3</sup>, colorless oil.

$^1\text{H}$  NMR ( $\text{CDCl}_3$ , 400 MHz)  $\delta$  2.33 (s, 3H), 3.28 (d,  $J = 7.1$  Hz, 2H), 3.72 (s, 3 H), 6.14-6.21 (m, 1H), 6.70 (d,  $J = 15.7$  Hz, 1H), 7.15 (m, 3H), 7.43 (d, 1H);

$^{13}\text{C}$  NMR ( $\text{CDCl}_3$ , 100 MHz)  $\delta$  19.8, 38.5, 51.9, 122.9, 125.7, 126.1, 127.5, 130.2, 131.4, 135.2, 136.0, 172.1 ppm.

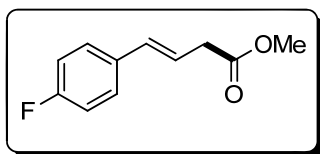

**Methyl (*E*)-4-(4-fluorophenyl)-3-butenolate (2g)**<sup>2</sup>, pale yellow oil.

$^1\text{H}$  NMR ( $\text{CDCl}_3$ , 400 MHz)  $\delta$  3.28 (d,  $J = 7.1$  Hz, 2H), 3.72 (s, 3 H), 6.18-6.25 (m, 1H), 6.70 (d,  $J = 15.9$  Hz, 1H), 7.15 (t, 2H), 7.43 (t, 2H);

$^{13}\text{C}$  NMR ( $\text{CDCl}_3$ , 100 MHz)  $\delta$  38.1, 52.0, 115.4 (d,  $J = 1.4$  Hz), 121.4 (d,  $J = 2.3$  Hz), 127.8 (d,  $J = 8.9$  Hz), 129.7, 132.3, 162.2 (d,  $J = 245$  Hz), 172.0 ppm.

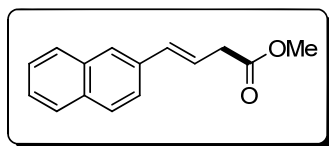

**Methyl (*E*)-3-(Naphthalen-2-yl)-3-butenolate (2h)**, colorless oil.

$^1\text{H}$  NMR ( $\text{CDCl}_3$ , 400 MHz)  $\delta$  3.32 (d,  $J = 7.1$  Hz, 2H), 3.74 (s, 3 H), 6.39-6.47 (m, 1H), 6.65 (d,  $J = 15.9$  Hz, 1H), 7.41-7.47 (m, 2H), 7.60 (s, 1H), 7.71 (s, 1H), 7.77-7.80 (m, 3H)

$^{13}\text{C}$  NMR ( $\text{CDCl}_3$ , 100 MHz)  $\delta$  38.4, 52.0, 122.0, 123.5, 125.9, 126.2, 126.3, 127.7, 128.0, 128.2, 133.0, 133.6, 133.6, 134.3, 172.1 ppm.

HRMS EI ( $m/z$ ): calcd for  $\text{C}_{15}\text{H}_{14}\text{O}_2$ , 226.0989; found, 226.0994.

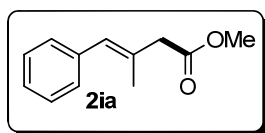

**Mixed with**

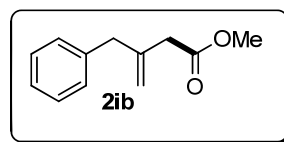

**Methyl (*E*)-3-methyl-4-phenyl-3-butenolate (2ia)**<sup>4</sup>, colorless oil.

$^1\text{H}$  NMR ( $\text{CDCl}_3$ , 400 MHz)  $\delta$  1.94 (s, 3H), 3.19 (s, 2H), 3.72 (s, 3H), 6.39 (s, 1H), 7.20-7.33 (m, 5 H);

$^{13}\text{C}$  NMR ( $\text{CDCl}_3$ , 100 MHz)  $\delta$  18.0, 45.7, 51.9, 126.4, 128.1, 128.4, 128.9, 129.1, 129.1, 172.0 ppm.

**Methyl 3-benzyl-3-butenolate (2ib)**

$^1\text{H}$  NMR ( $\text{CDCl}_3$ , 400 MHz)  $\delta$  2.99 (s, 2H), 3.45 (s, 2H), 3.66 (s, 3H), 4.96 (s, 1H), 4.99 (s, 1H), 7.20-7.33 (m, 5 H);

$^{13}\text{C}$  NMR ( $\text{CDCl}_3$ , 100 MHz)  $\delta$  40.9, 42.7, 51.8, 115.8, 126.5, 131.5, 137.6, 138.7, 141.8, 171.8 ppm.

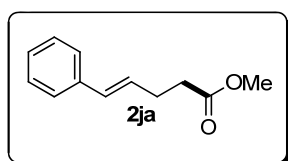

**Mixed with**

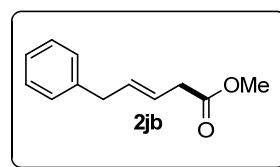

**Methyl (*E*)-5-phenyl-4-pentenoate (2ja)**<sup>8</sup>, colorless oil.

$^1\text{H}$  NMR ( $\text{CDCl}_3$ , 400 MHz)  $\delta$  2.49-2.55 (m, 4H), 3.69 (s, 3H), 6.66-6.24 (m, 1H), 6.43 (d,  $J = 15.9$  Hz, 1H), 7.17-7.34 (m, 5 H);  
 $^{13}\text{C}$  NMR ( $\text{CDCl}_3$ , 100 MHz)  $\delta$  28.3, 33.8, 51.6, 126.1, 127.2, 128.4, 128.5, 131.0, 137.4, 173.4 ppm.

**Methyl (*E*)-5-phenyl-3-pentenoate (2jb)<sup>9</sup>**

$^1\text{H}$  NMR ( $\text{CDCl}_3$ , 400 MHz)  $\delta$  3.07 (d,  $J = 6.6$  Hz, 2H), 3.38 (d,  $J = 6.4$  Hz, 2H), 3.69 (s, 3H), 5.63-5.74 (m, 2H), 7.17-7.34 (m, 5 H).

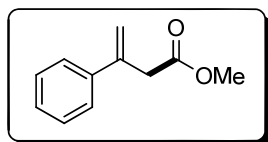

**Methyl 3-phenyl-3-butenolate (2k)<sup>6</sup>**, colorless oil.

$^1\text{H}$  NMR ( $\text{CDCl}_3$ , 400 MHz)  $\delta$  3.53 (s, 2H), 3.66 (s, 3H), 5.24 (s, 1H), 5.56 (s, 1H), 7.27-7.35 (m, 3H), 7.43 (d, 2H);  
 $^{13}\text{C}$  NMR ( $\text{CDCl}_3$ , 100 MHz)  $\delta$  41.1, 52.0, 116.3, 125.8, 127.8, 128.4, 139.7, 140.8, 171.8 ppm.

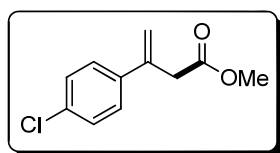

**Methyl 3-(4-chlorophenyl)-3-butenolate (2l)<sup>6</sup>**, pale yellow oil.

$^1\text{H}$  NMR ( $\text{CDCl}_3$ , 400 MHz)  $\delta$  3.50 (s, 2H), 3.66 (s, 3H), 5.25 (s, 1H), 5.54 (s, 1H), 7.29 (d,  $J = 8.4$  Hz, 2H), 7.36 (d,  $J = 8.4$  Hz, 2H);  
 $^{13}\text{C}$  NMR ( $\text{CDCl}_3$ , 100 MHz)  $\delta$  41.0, 52.1, 117.0, 125.4, 127.8, 128.4, 139.7, 140.8, 171.8 ppm.



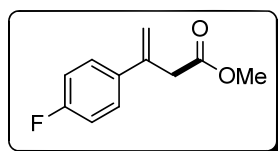

**Methyl 3-(4-fluorophenyl)-3-butenolate (2m)**<sup>6</sup>, yellow oil.

<sup>1</sup>H NMR (CDCl<sub>3</sub>, 400 MHz) δ 3.50 (s, 2H), 3.66 (s, 3H), 5.22 (s, 1H), 5.49 (s, 1H), 7.01 (t, 2H), 7.40 (t, 2H);

<sup>13</sup>C NMR (CDCl<sub>3</sub>, 100 MHz) δ □ 41.2, 52.0, 115.2 (d, *J* = 21.4 Hz), 116.3, 127.5 (d, *J* = 8.0 Hz), 135.8 (d, *J* = 3.4 Hz), 139.9, 162.5 (d, *J* = 245 Hz), 171.6 ppm.

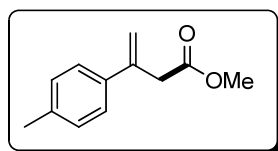

**Methyl 3-(4-methylphenyl)-3-butenolate (2n)**<sup>8</sup>, colorless oil.

<sup>1</sup>H NMR (CDCl<sub>3</sub>, 400 MHz) δ 2.34 (s, 3H), 3.51 (d, *J* = 0.4 Hz, 2H), 3.65 (s, 3H), 5.18 (s, 1H), 5.53 (s, 1H), 7.13 (d, *J* = 8.0 Hz, 2H), 7.30 (d, *J* = 8.0 Hz, 2H);

<sup>13</sup>C NMR (CDCl<sub>3</sub>, 100 MHz) δ □ 21.1, 41.1, 52.0, 115.4, 125.6, 129.1, 136.8, 137.7, 140.6, 171.9 ppm.

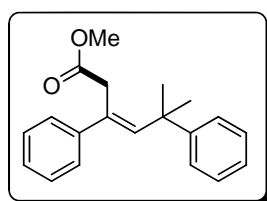

**Methyl (*E*)-5-methyl-3,5-diphenyl-3-hexenoate (3o)**, yellow oil.

<sup>1</sup>H NMR (CDCl<sub>3</sub>, 400 MHz) δ 1.53 (s, 6H), 3.01 (s, 2H), 3.41 (s, 3H), 6.25 (s, 1H), 7.16-7.41 (m, 10H);

<sup>13</sup>C NMR (CDCl<sub>3</sub>, 100 MHz) δ □ 31.6, 35.7, 40.3, 51.6, 125.8, 126.2, 126.3, 127.1, 128.3, 128.4, 133.5, 142.5, 142.9, 149.5, 171.3 ppm.

HRMS EI (*m/z*): calcd for C<sub>20</sub>H<sub>22</sub>O<sub>2</sub>, 294.1618; found, 294.1620.

## E. Mechanistic studies

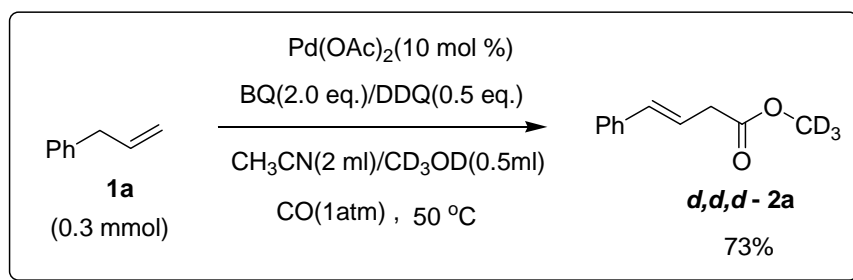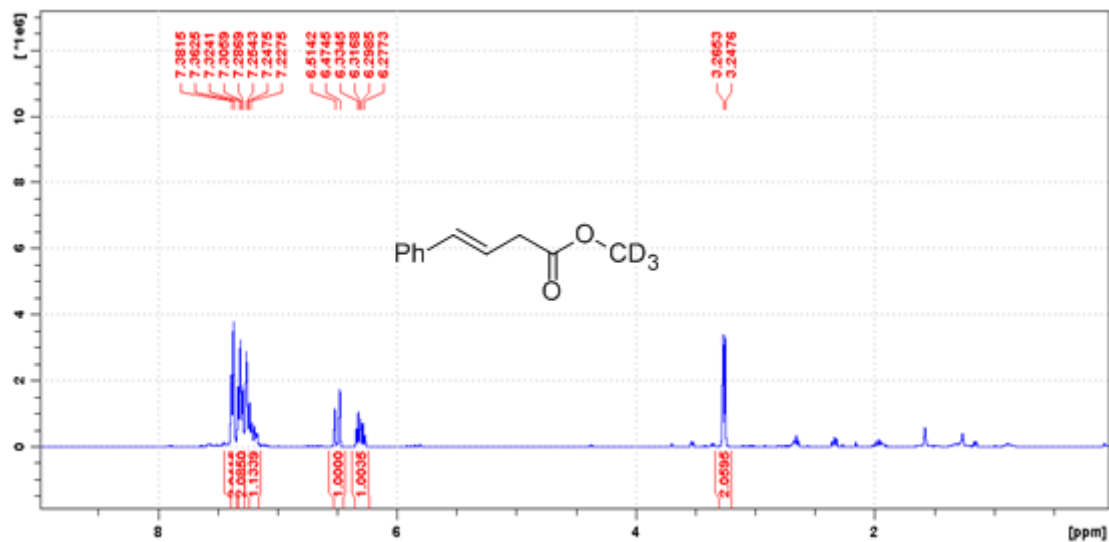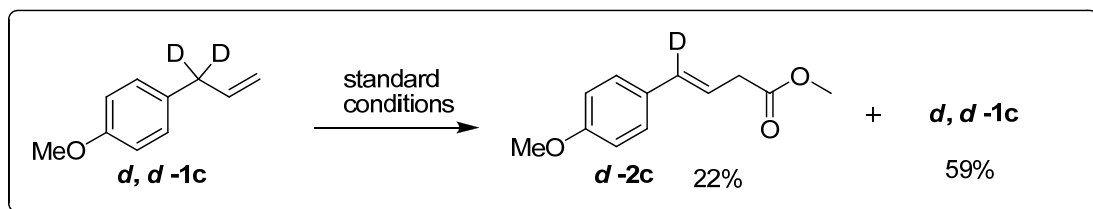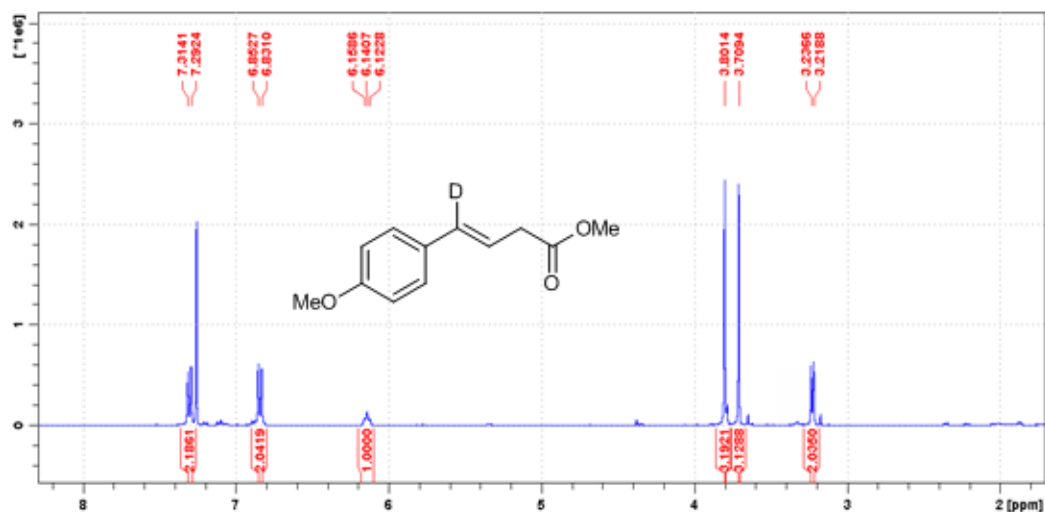

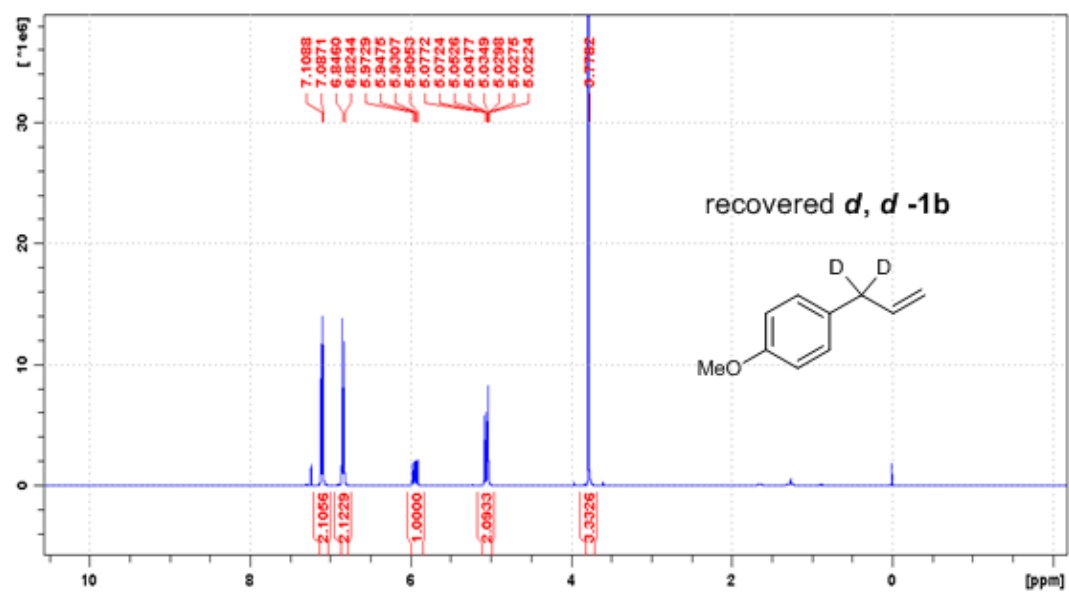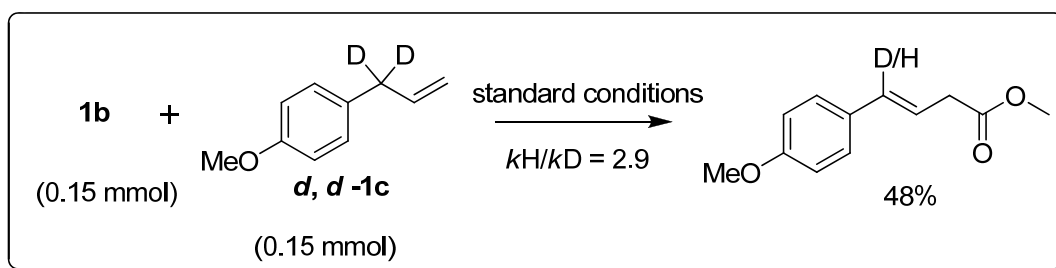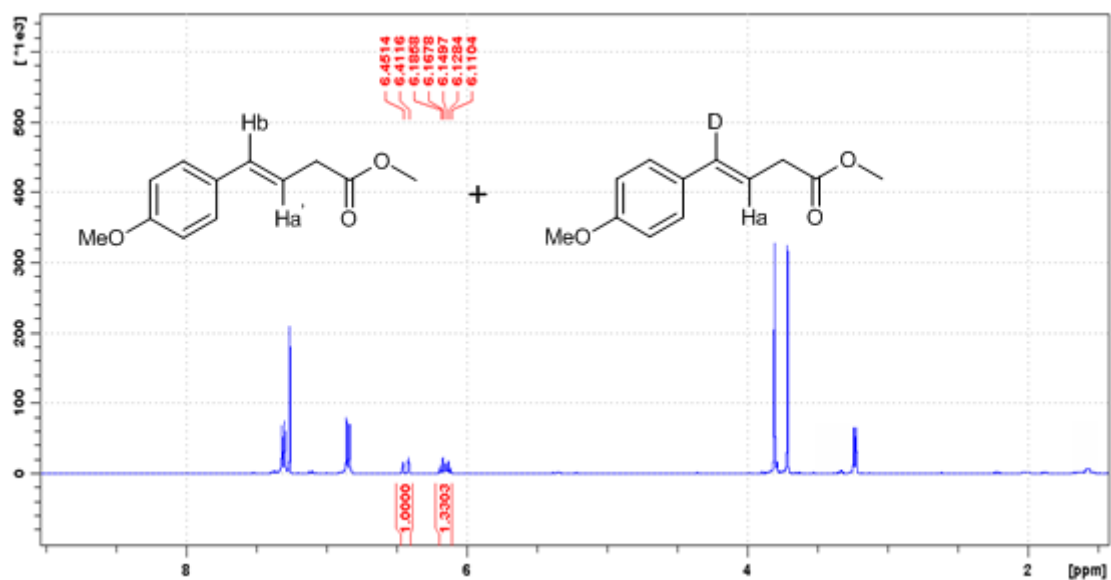

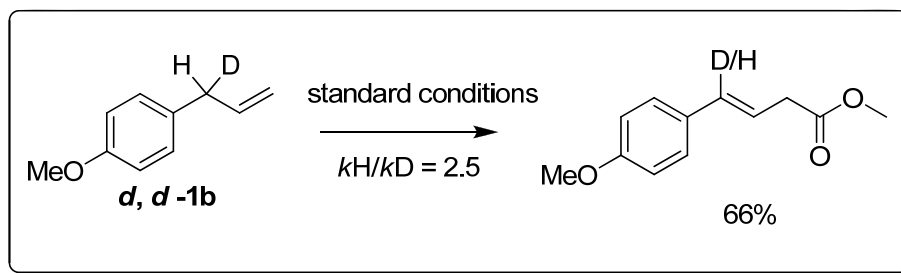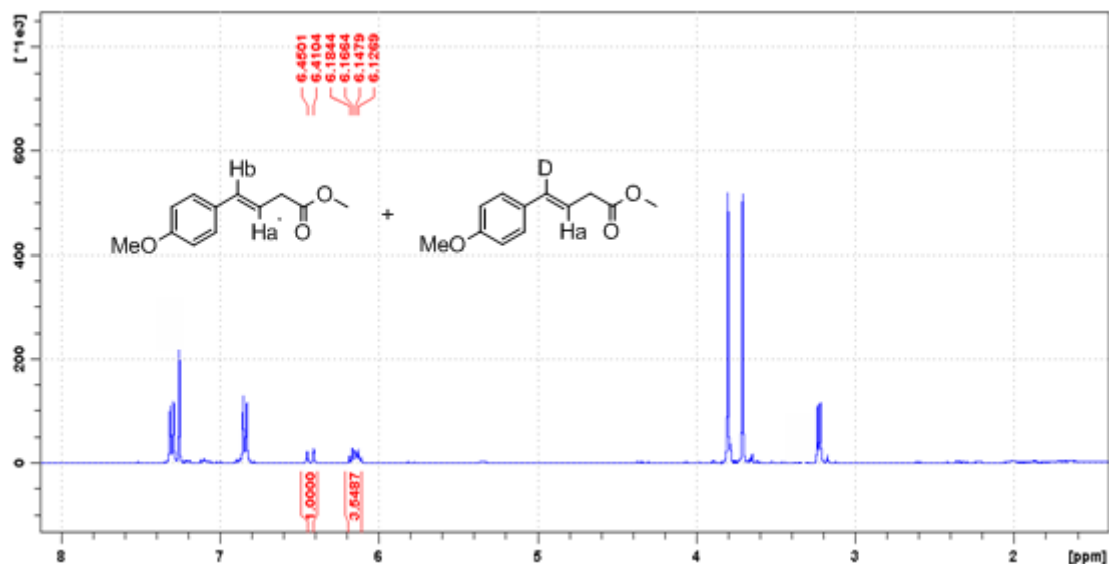

## F. References

- (1) Yin, G.; Wu, Y.; Liu, G. *J. Am. Chem. Soc.* **2010**, *132*, 11978.
- (2) Wemer, E.W.; Sigman, M.S. *J. Am. Chem. Soc.* **2010**, *132*, 13981.
- (3) Eur. Pat. Appl. 1992.
- (4) Bonete, P.; Nejera, C. *J. Org. Chem.* **1994**, *59*, 3202.
- (5) Tisene, P. S.; Peters, R. *Chem. Eur. J.* **2010**, *16*, 2503.
- (6) Nishi, T.; Ishibashi, K.; Nakajima, K.; Iio, Y.; Fukazawa, T. *Tetrahedron: Asymmetry* **1998**, *9*, 3251.
- (7) Gupta, A. K.; Song, C. H.; Oh, C. H. *Tetrahedron Lett.* **2004**, *45*, 4113.
- (8) Murakami, M.; Ishida, N.; Miura, T. *Chem. Comm.* **2006**, 643.
- (9) Pak, C. S.; Lee, E.; Lee, G. H. *J. Org. Chem.* **1993**, *58*, 1523.
- (10) Bulughapitiya, P.; Landais, Y.; Parra-Rapado, L.; Planchenault, L.; Weber, V. *J. Org. Chem.* **1997**, *62*, 1630.

## F. NMR Spectra

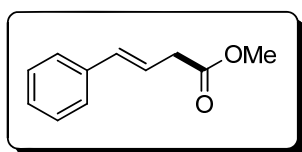

2a

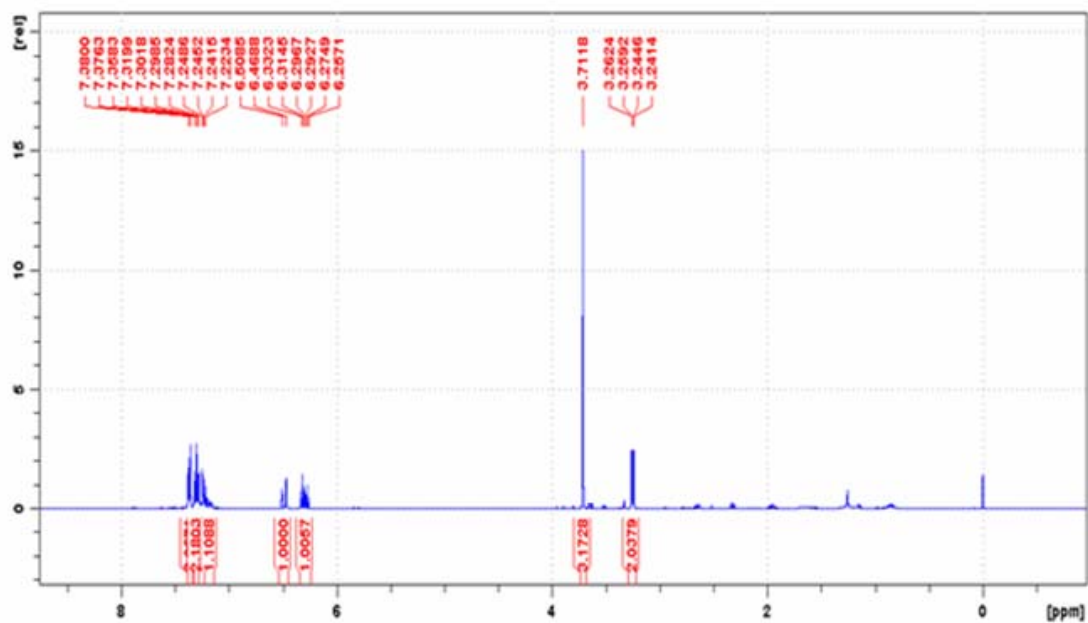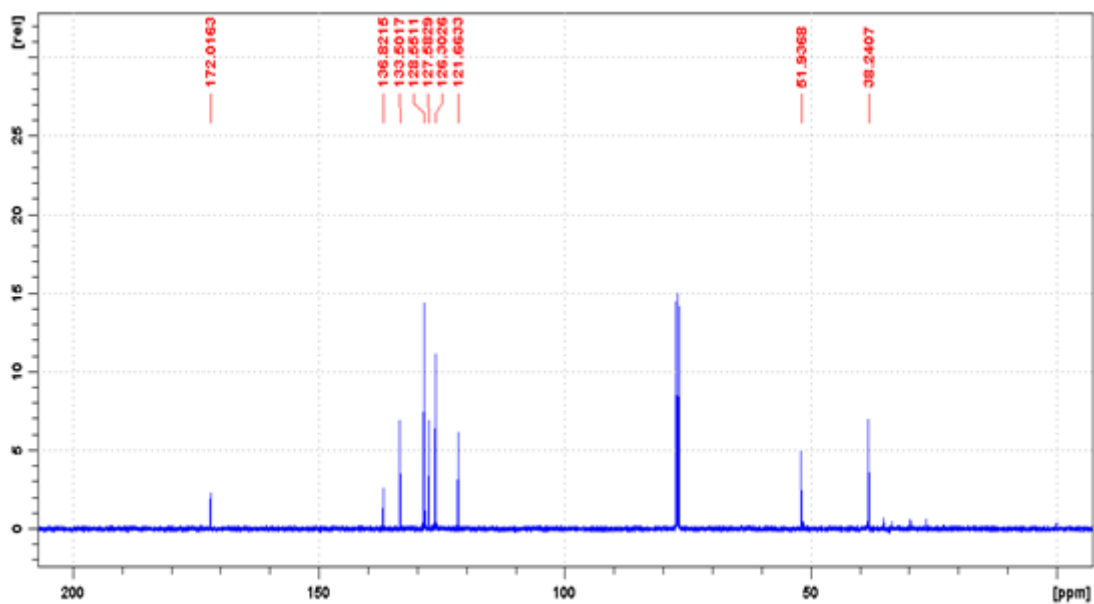

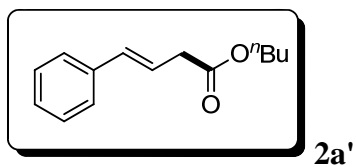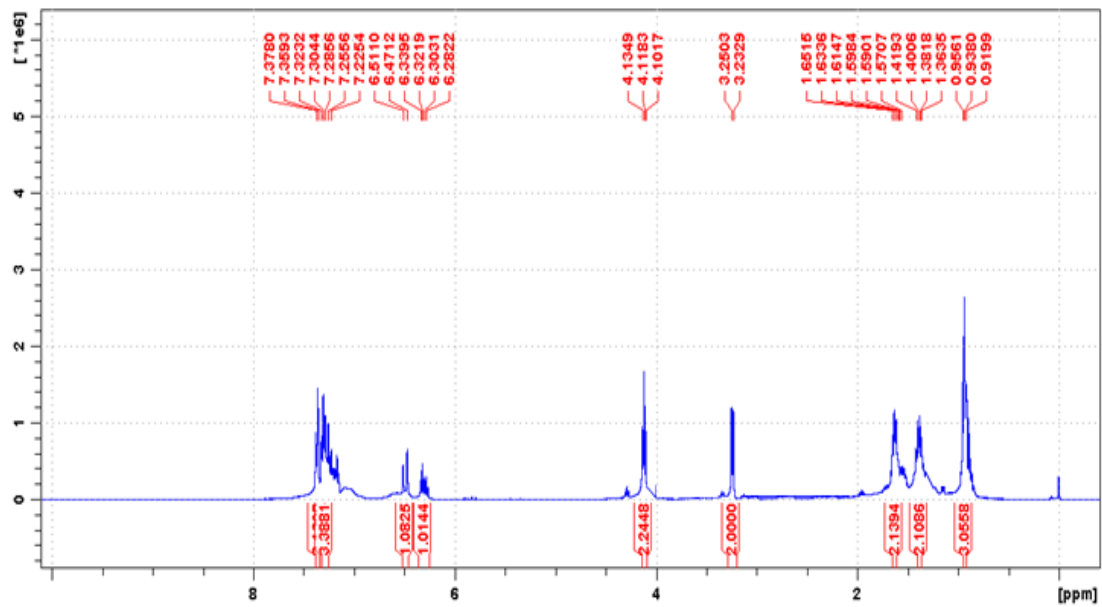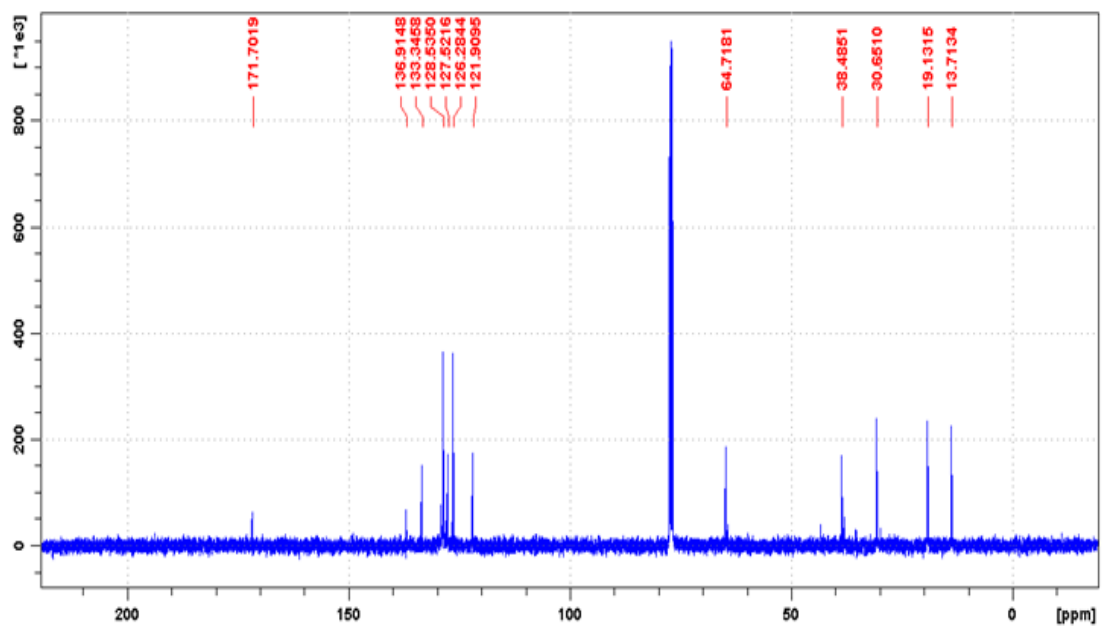

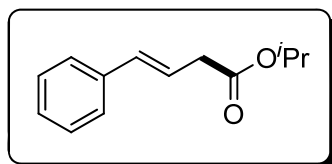

2a''

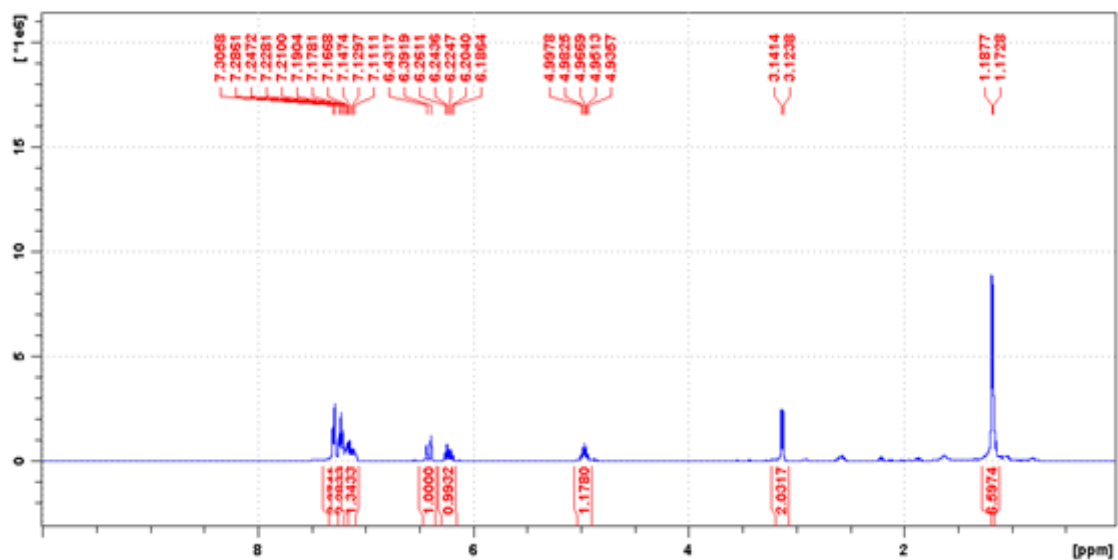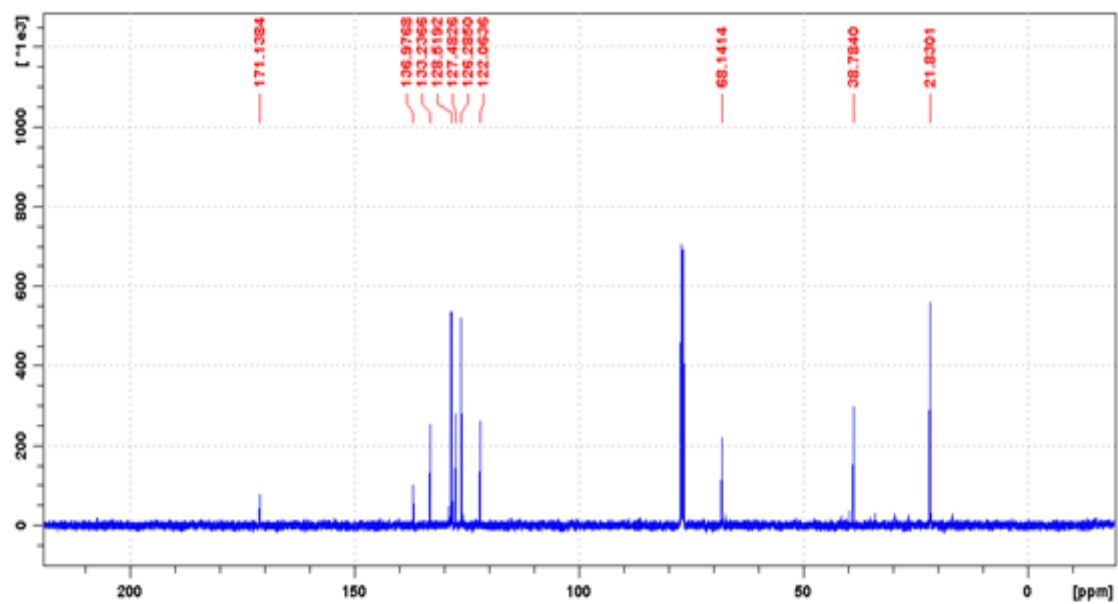

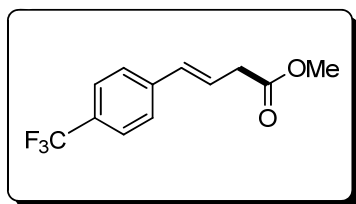

2b

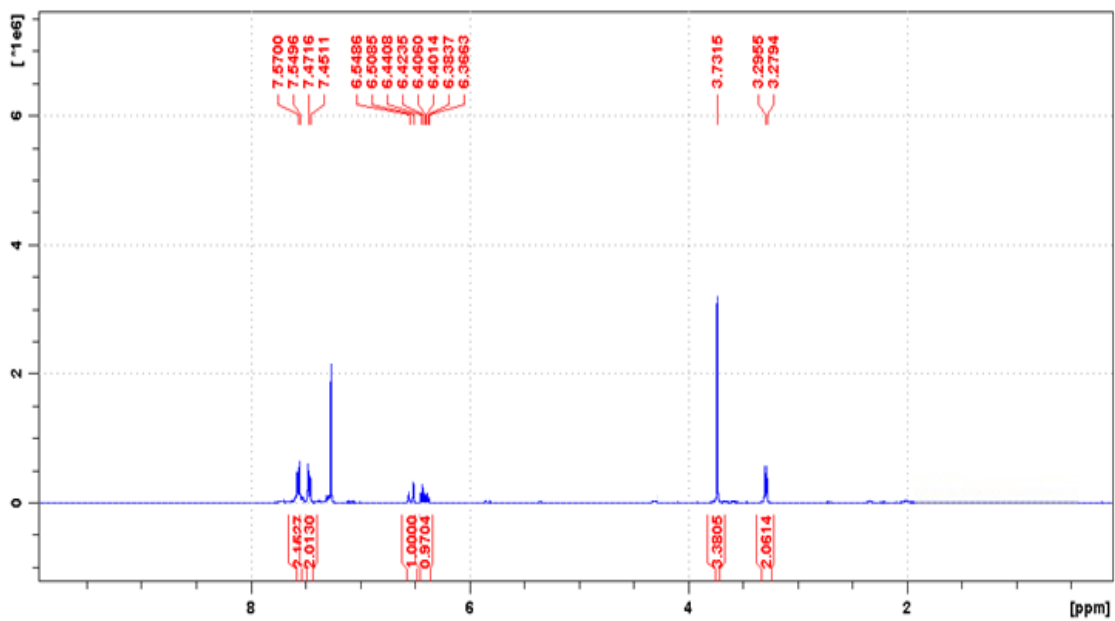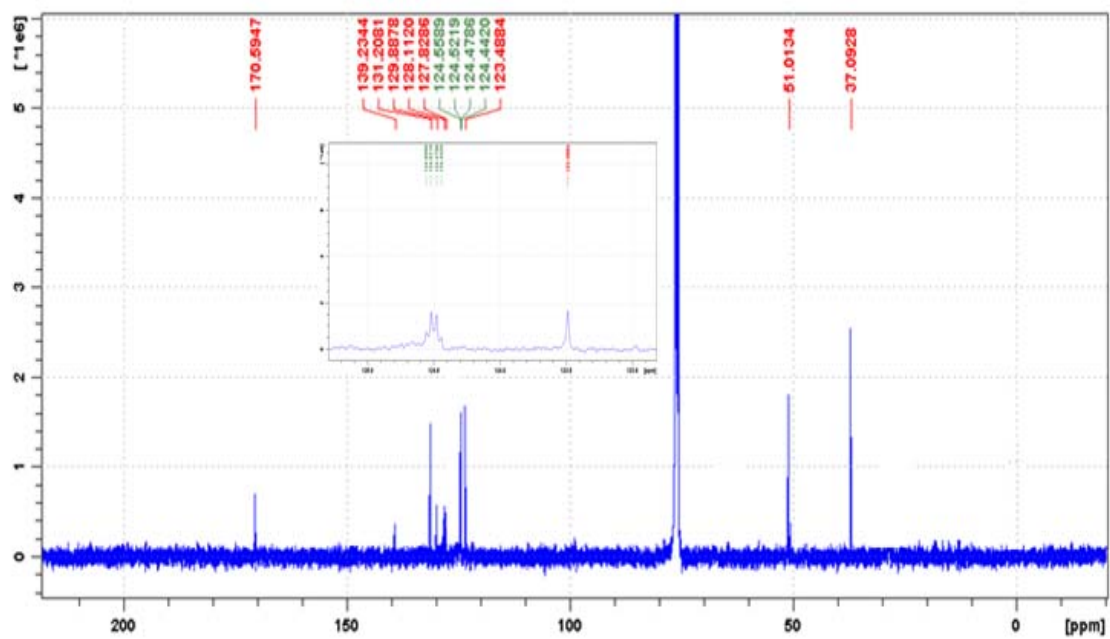



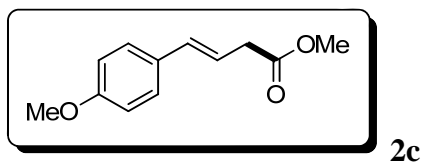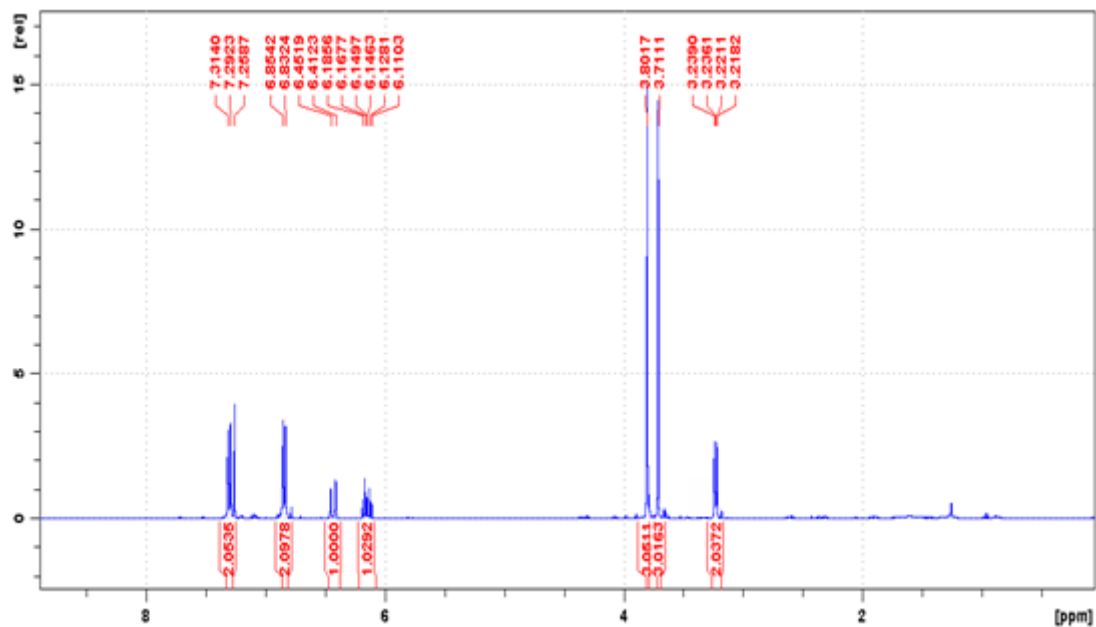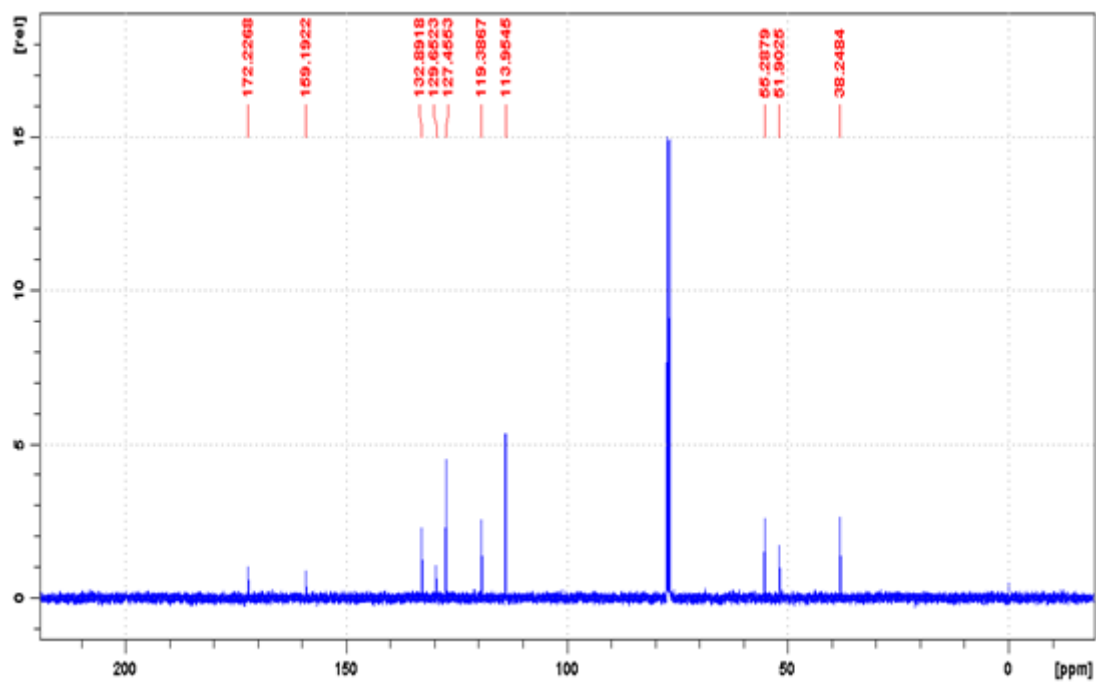

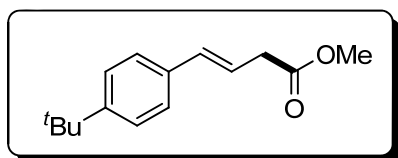

2d

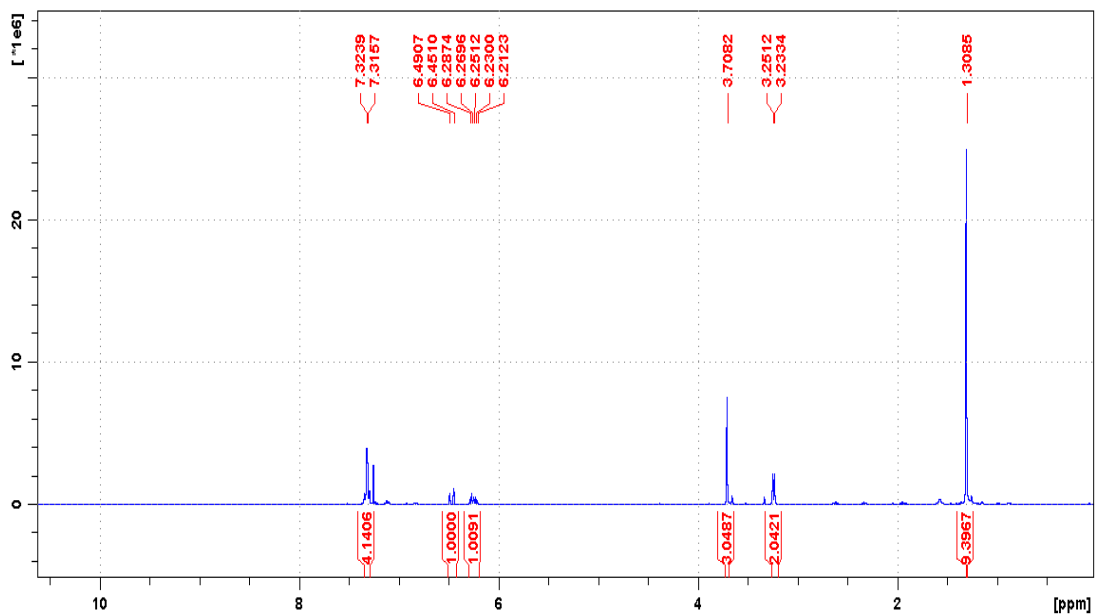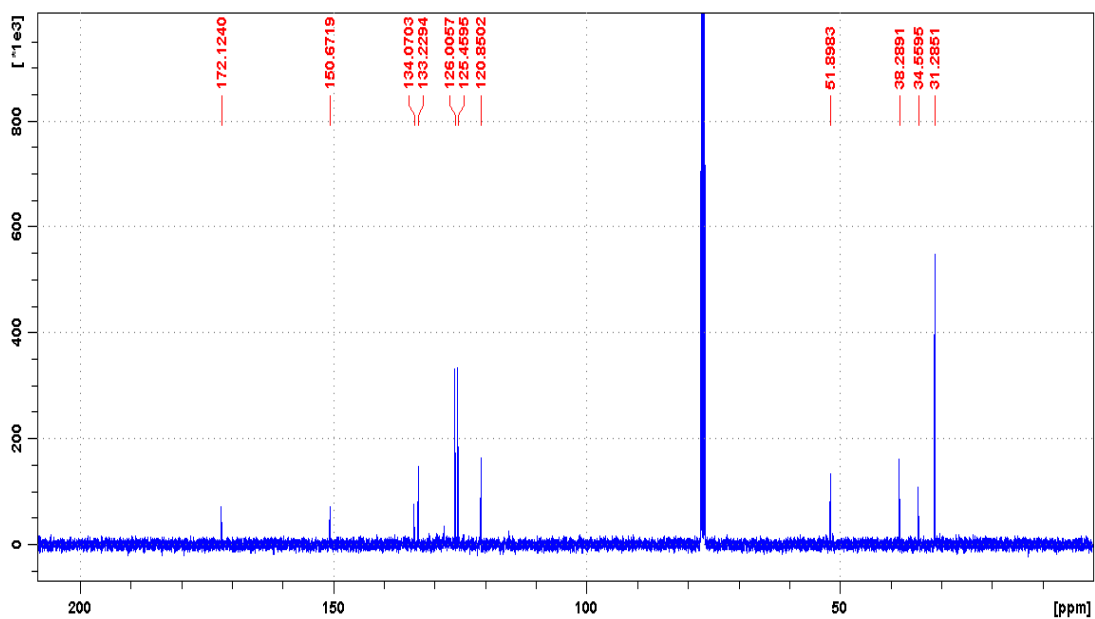

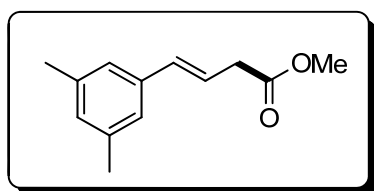

2e

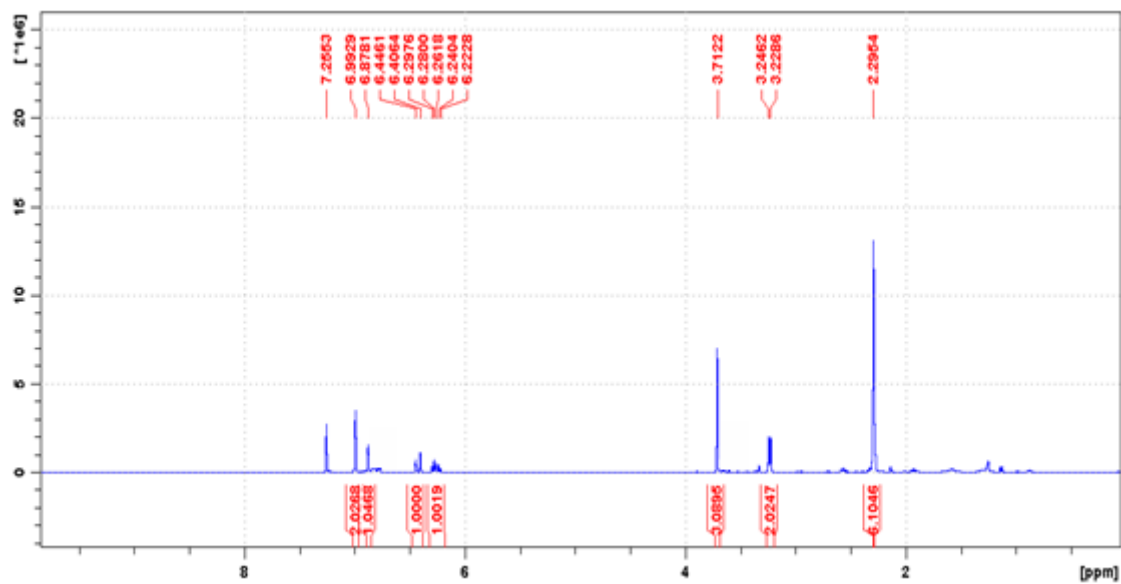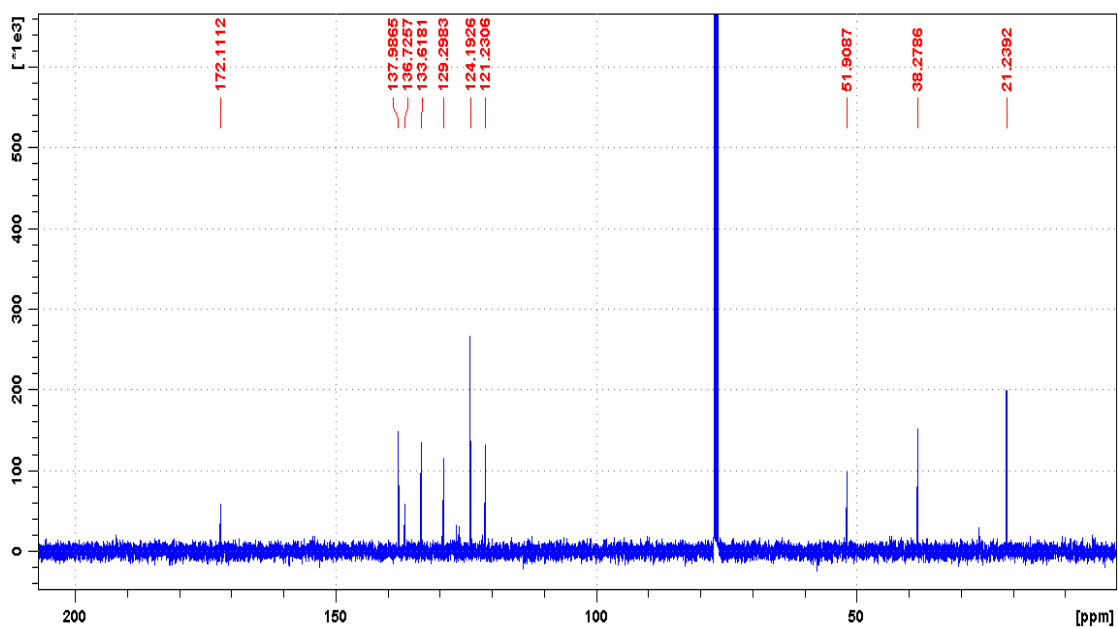

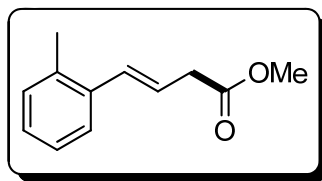

2f

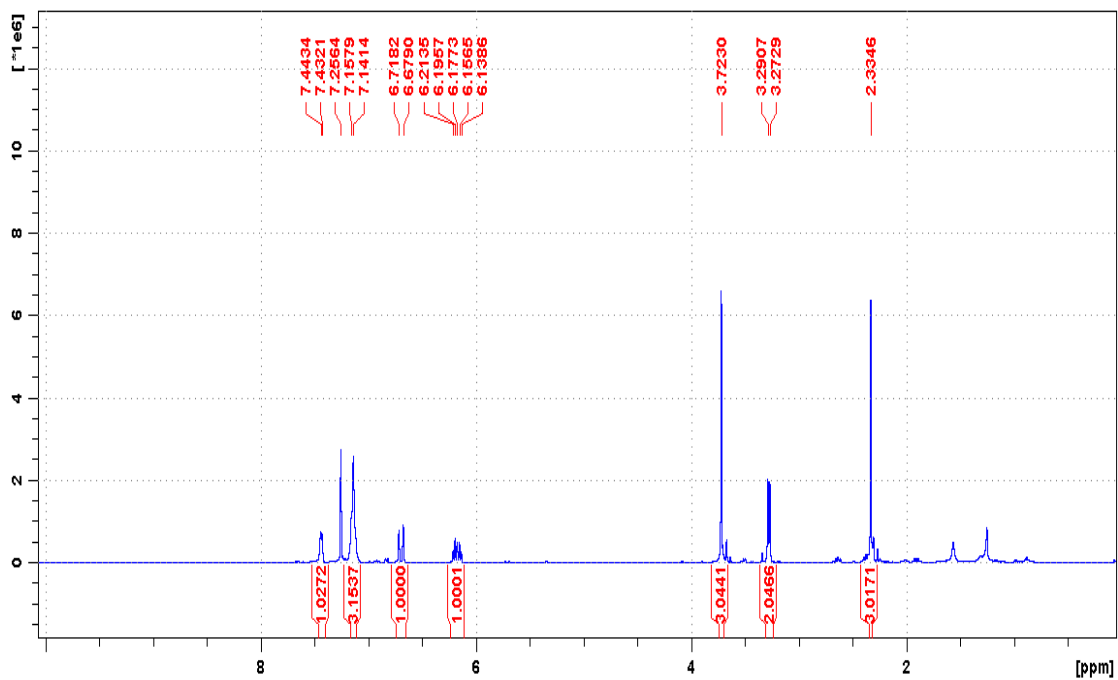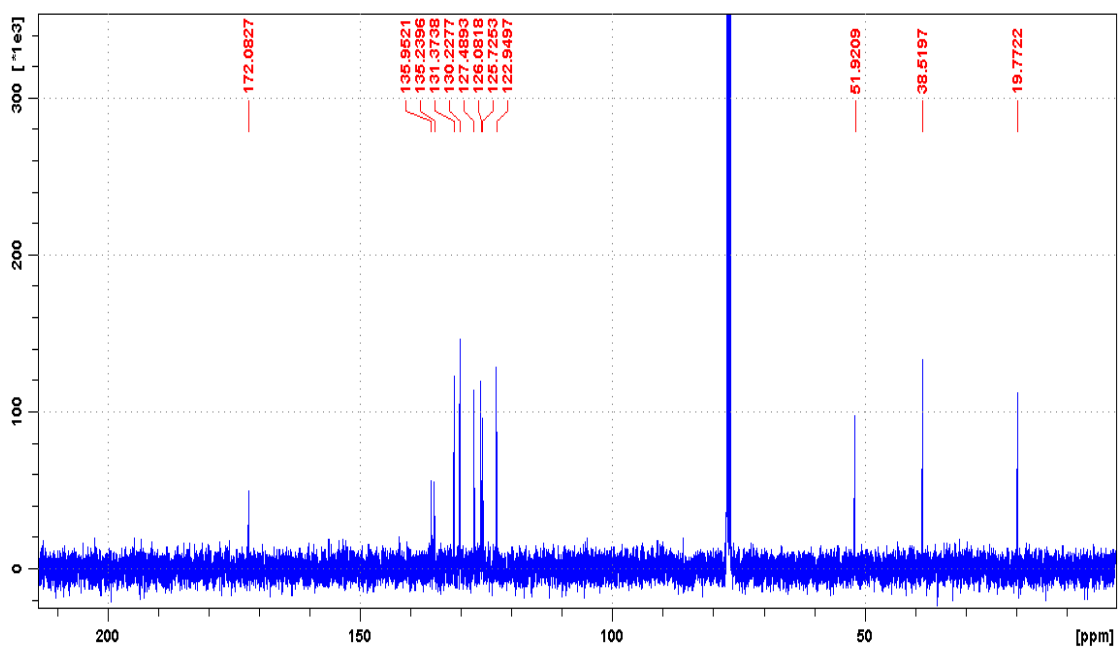

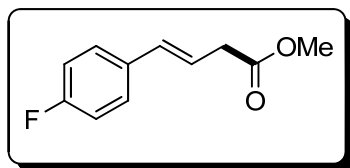

2g

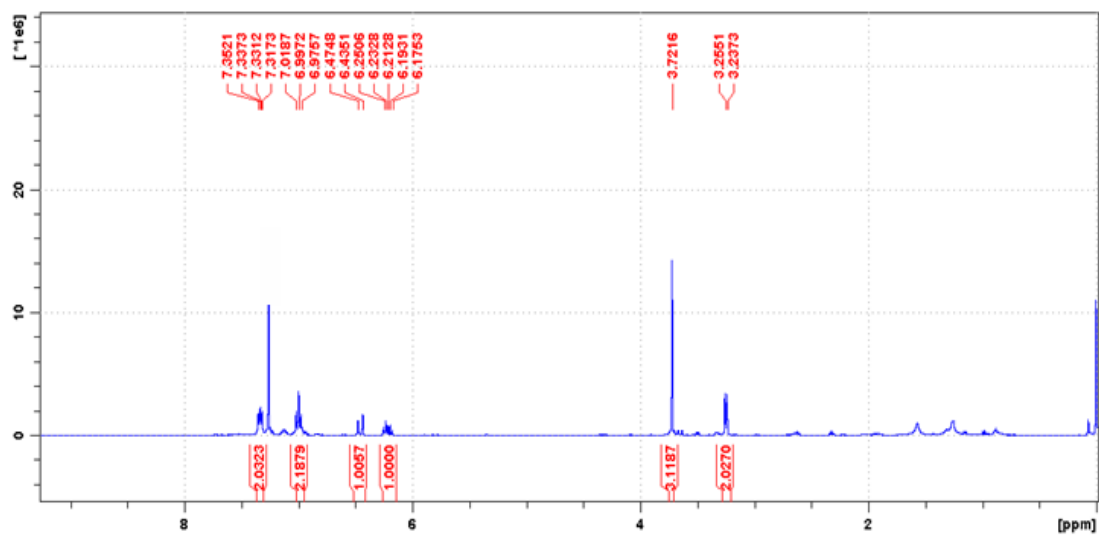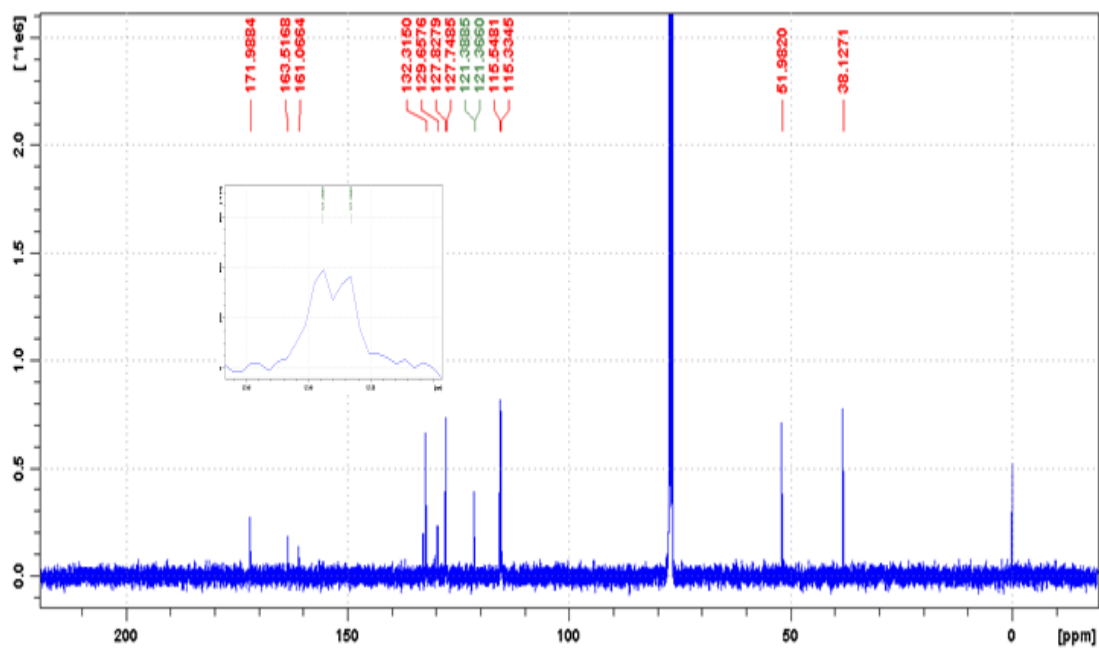

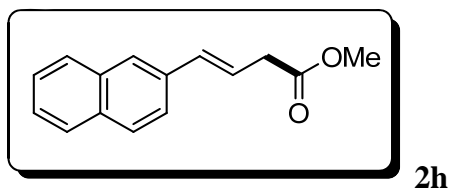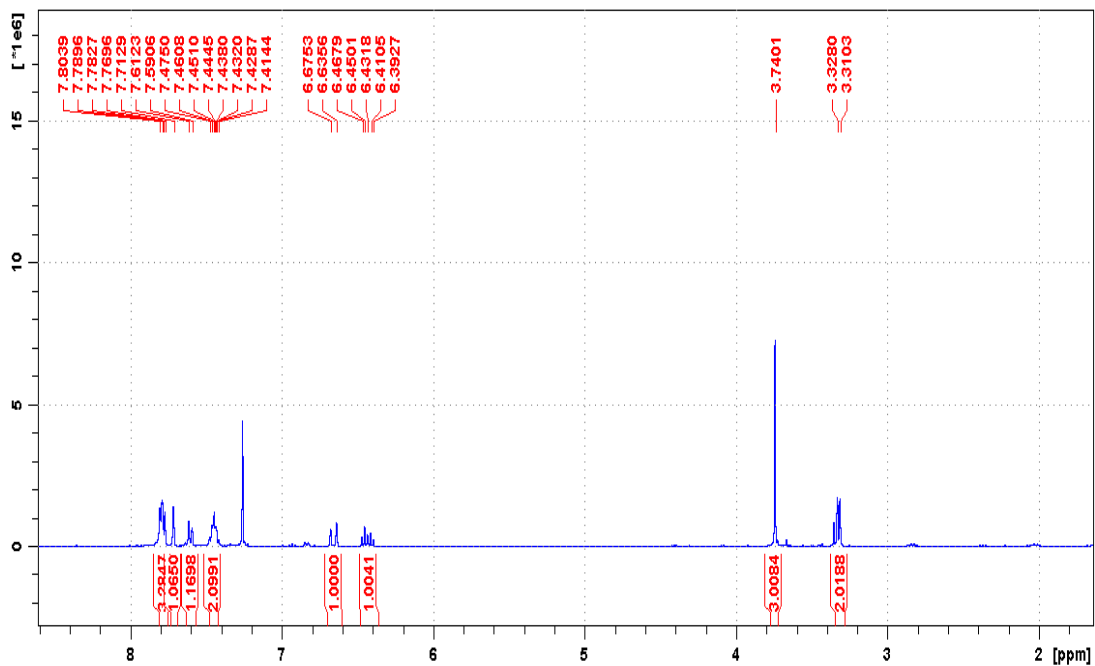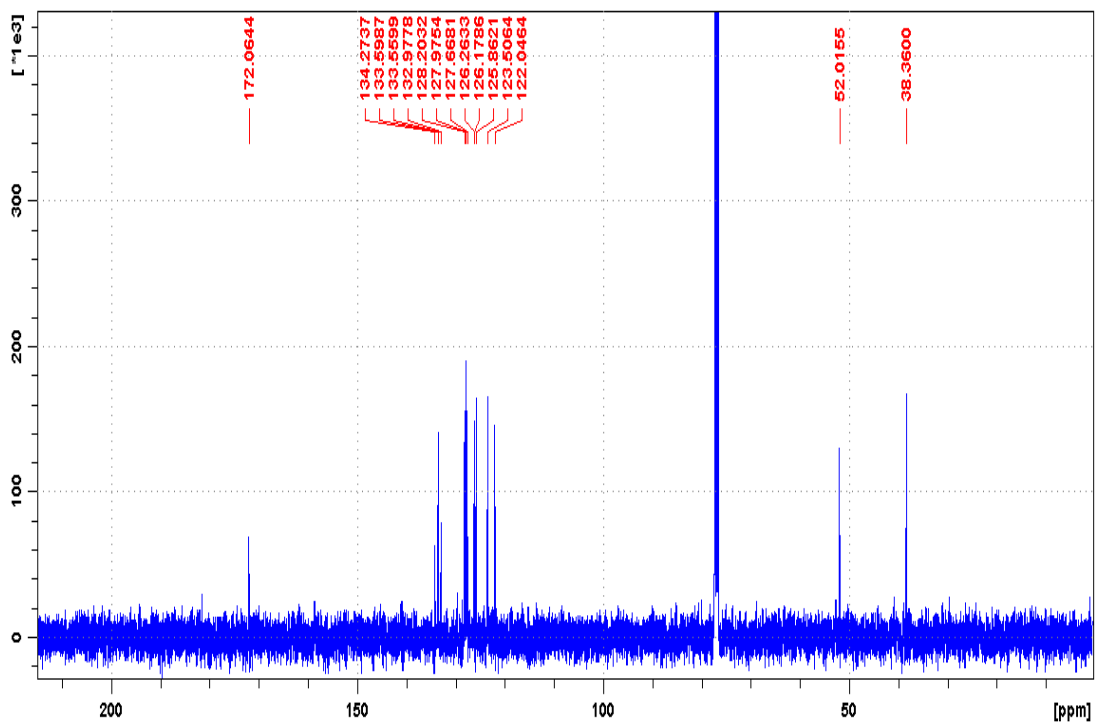

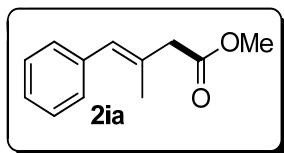

Mixed with

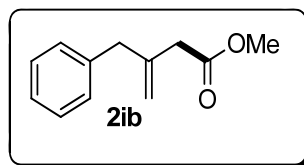

2ia : 2ib= 2.5:1

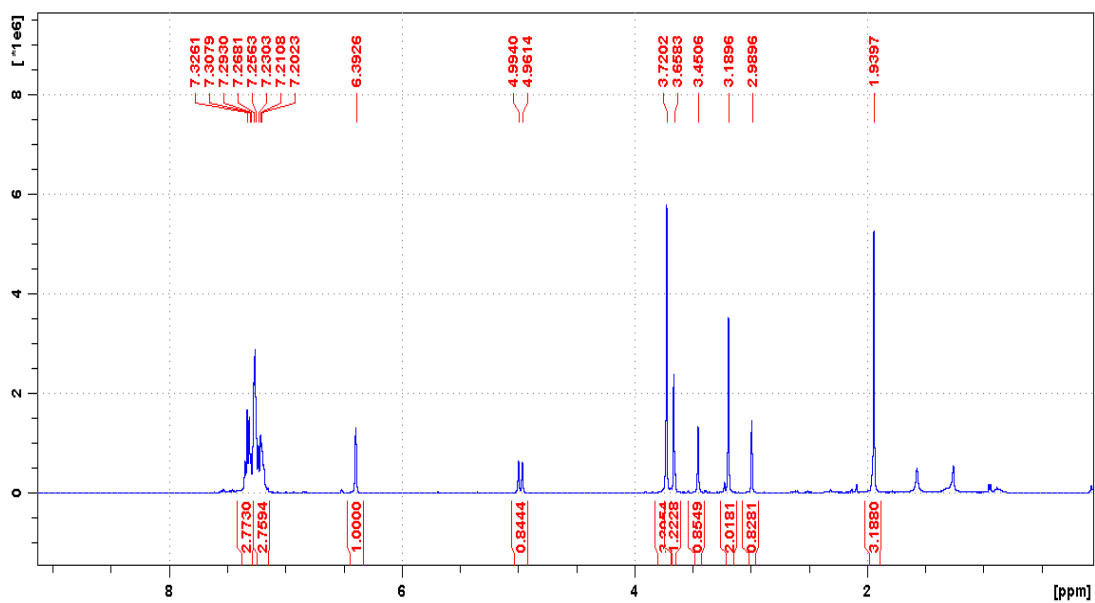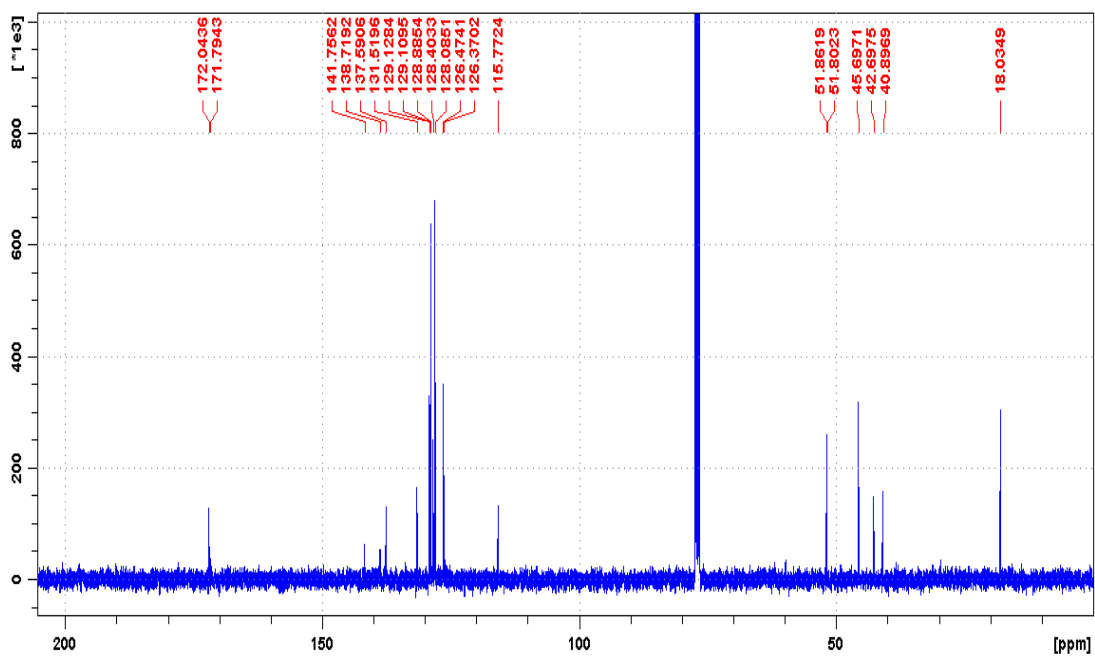

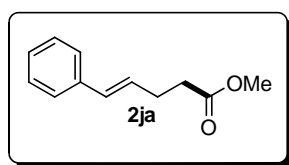

Mixed with

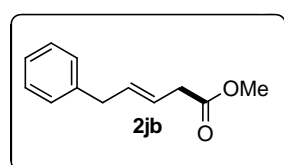

2ja : 2jb = 3:1

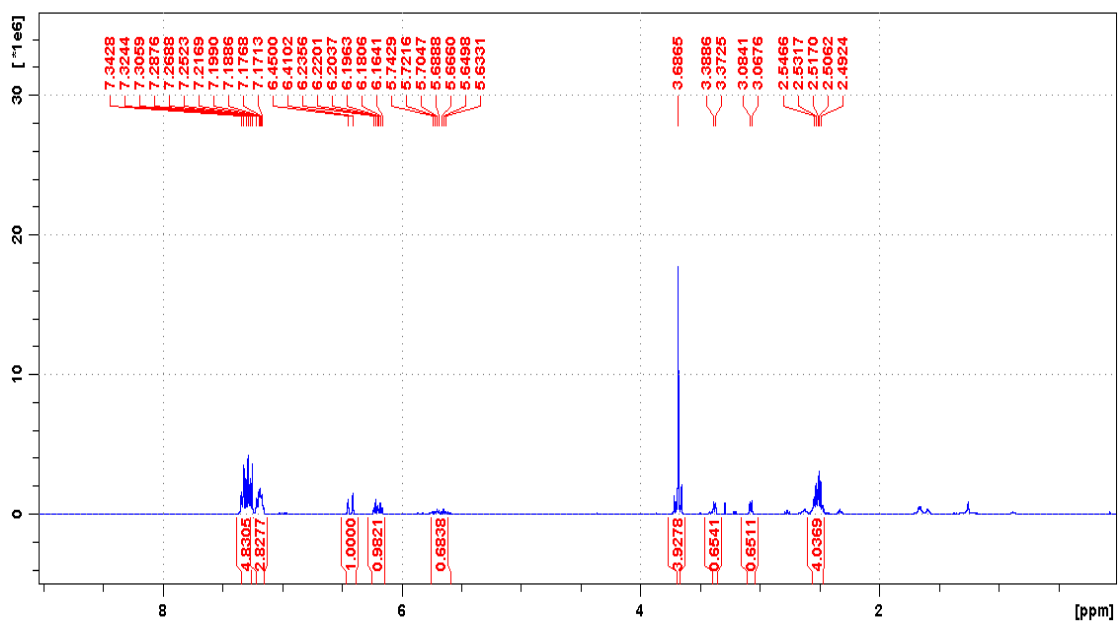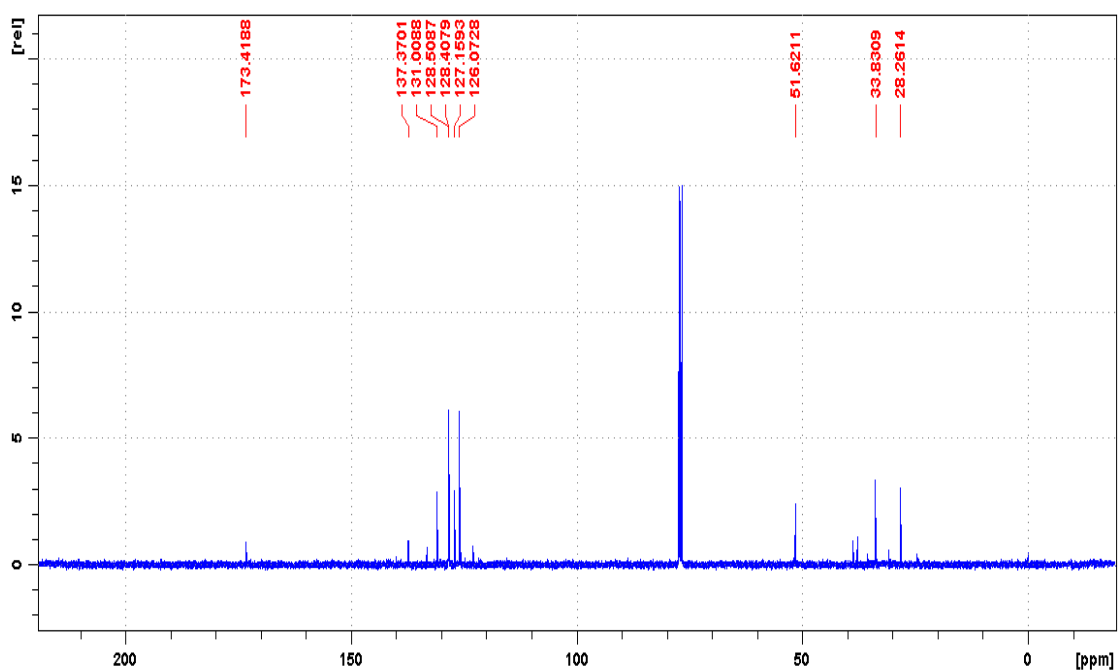



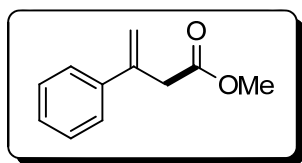

2k

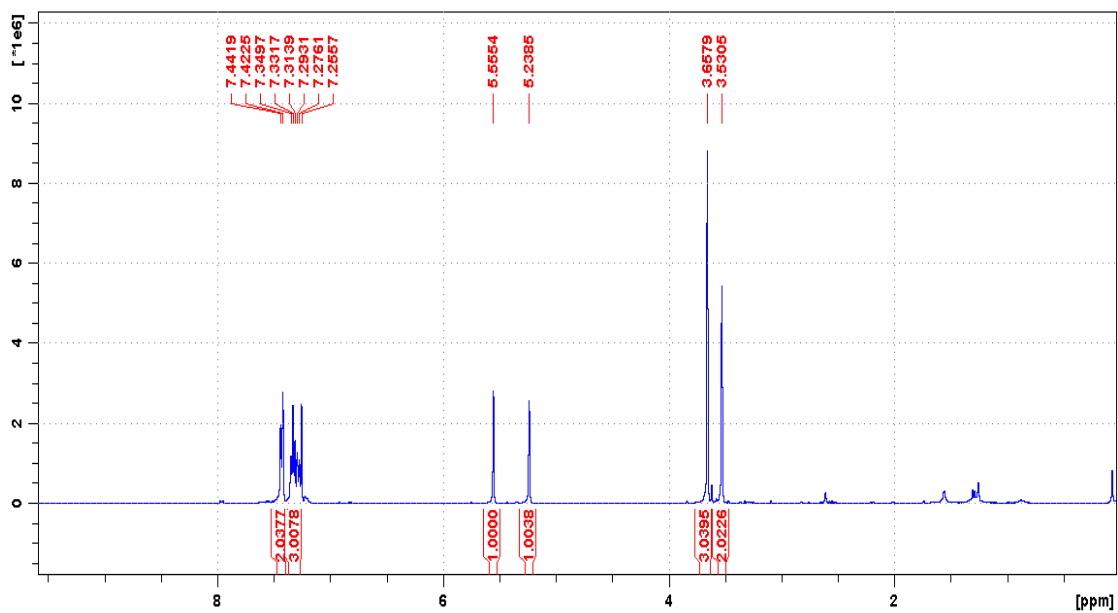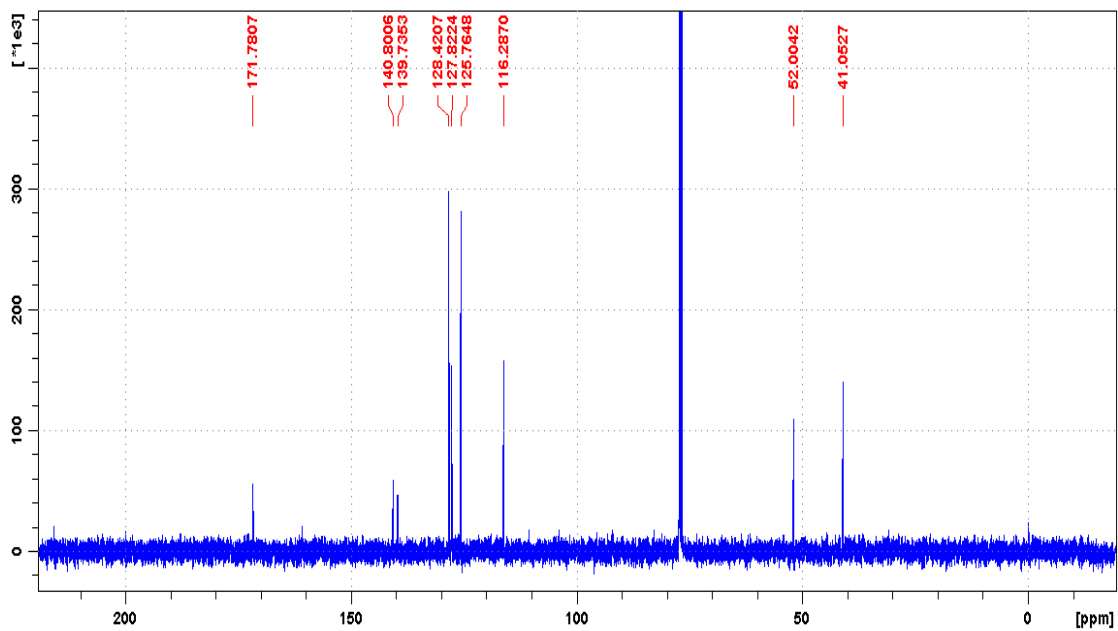

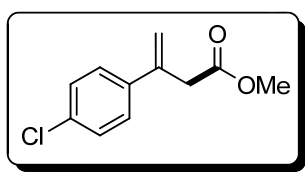

21

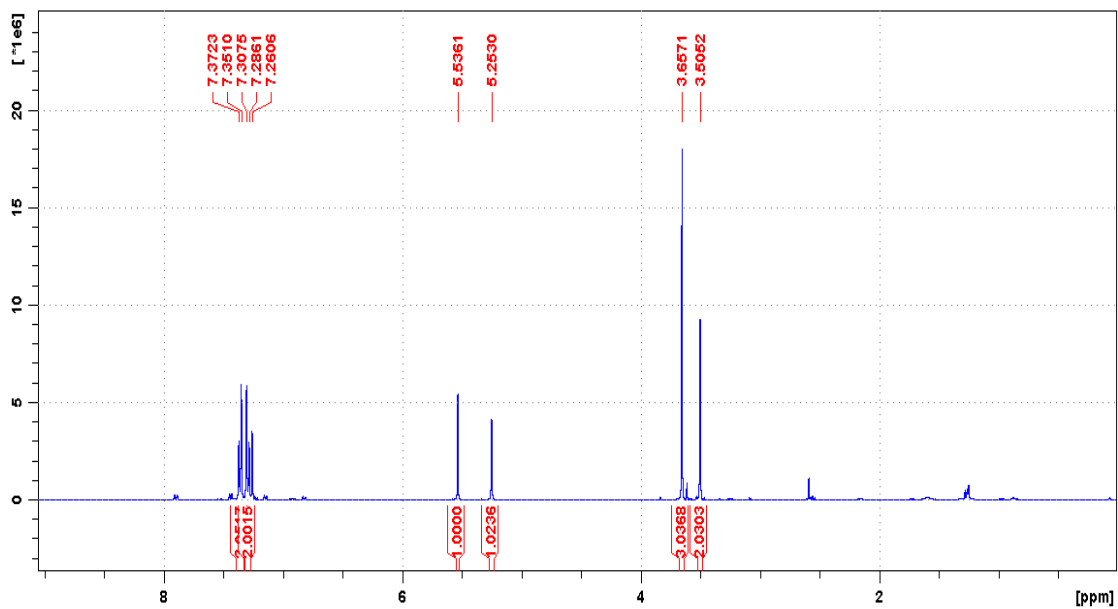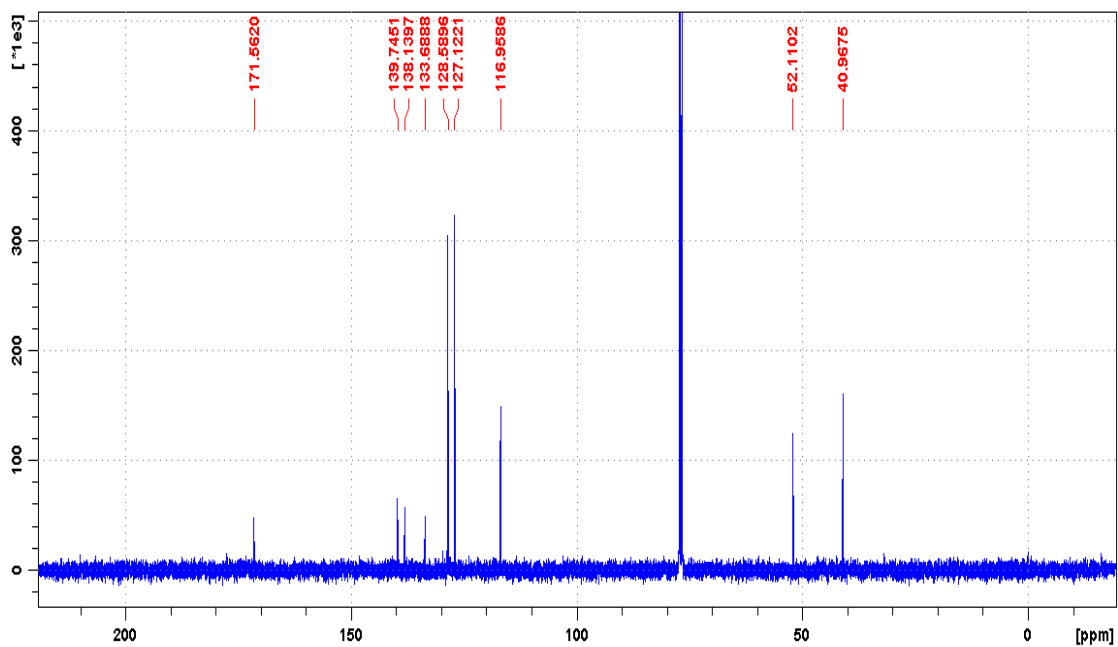

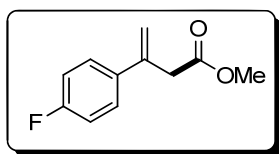

2m

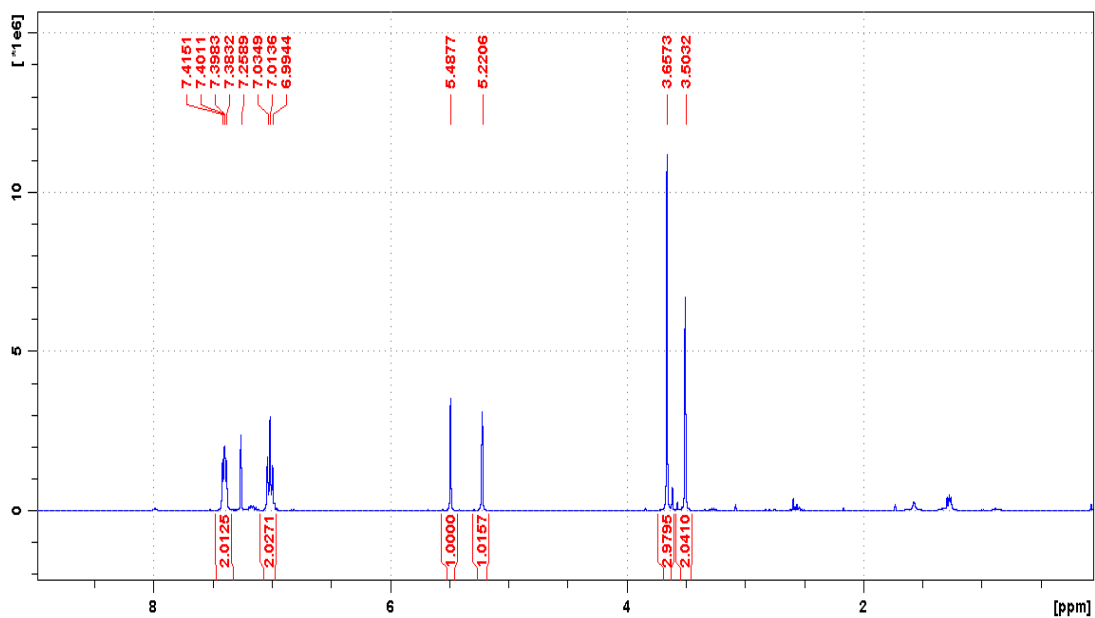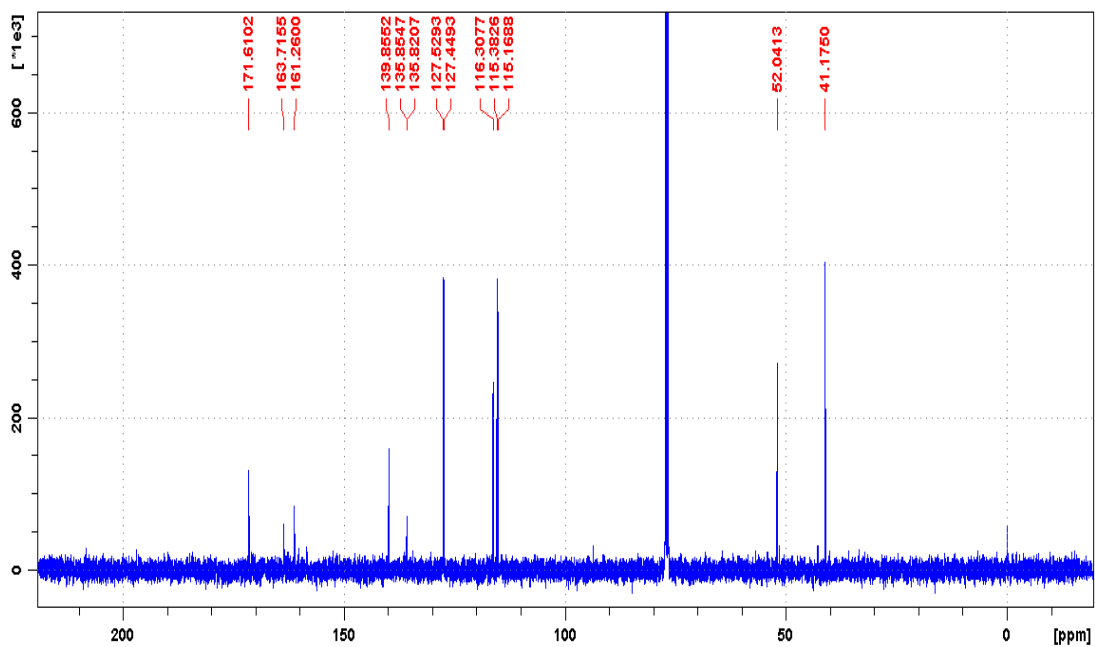

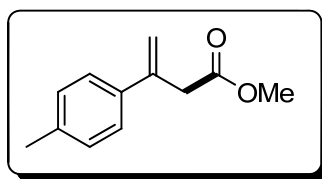

2n

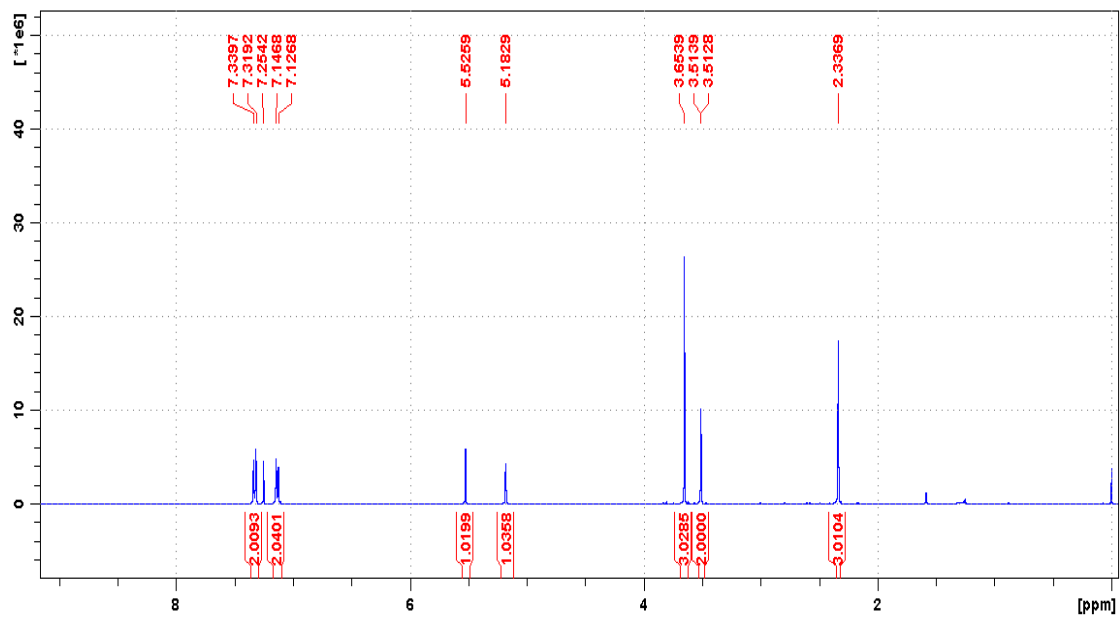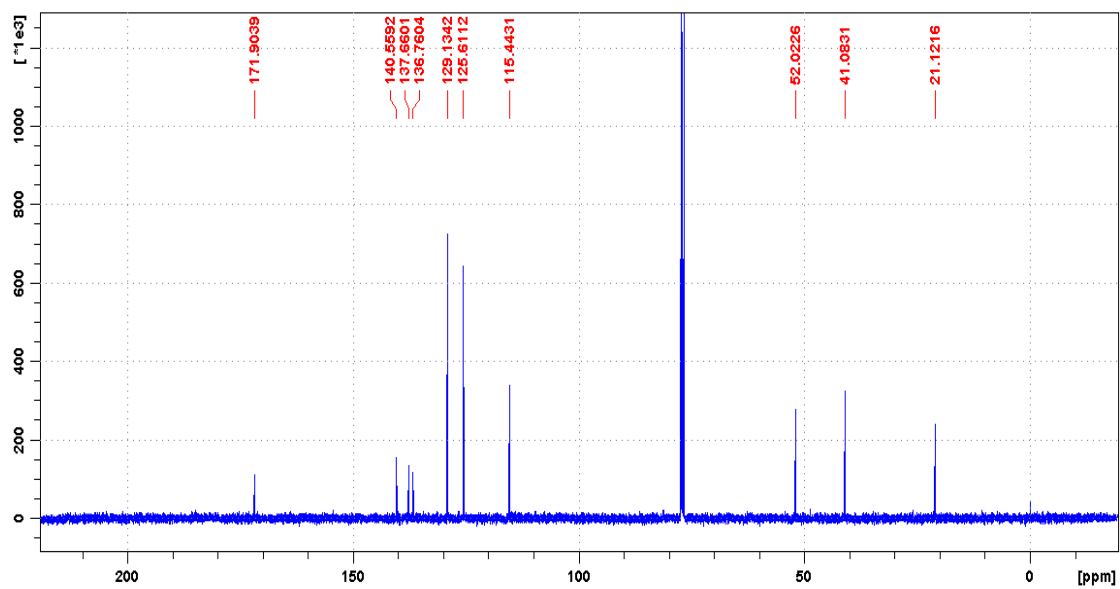

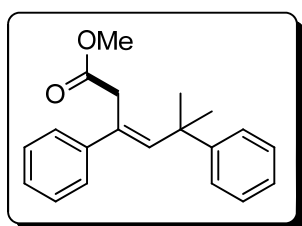

2o

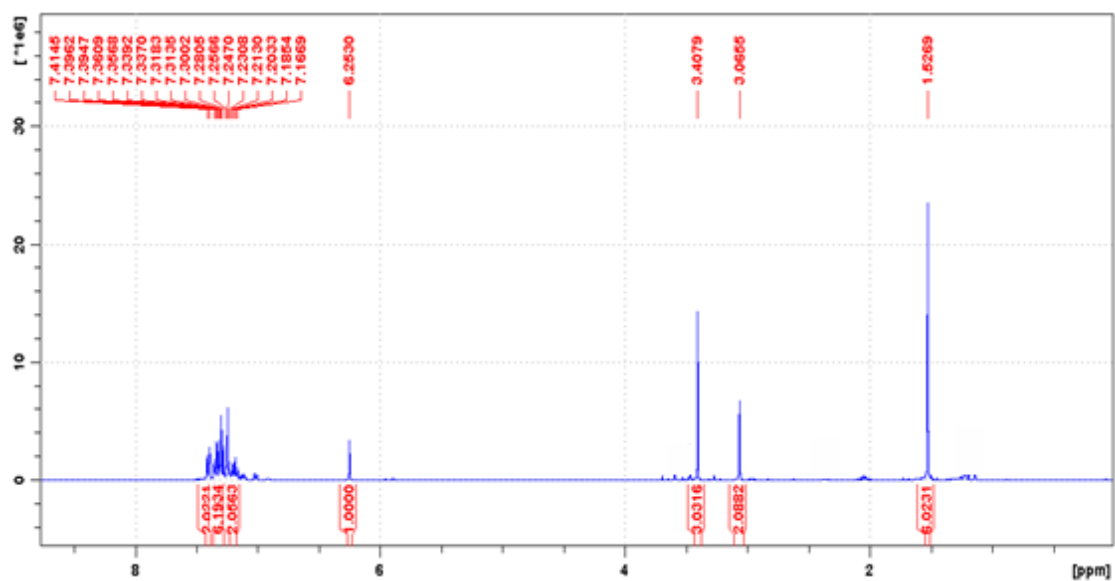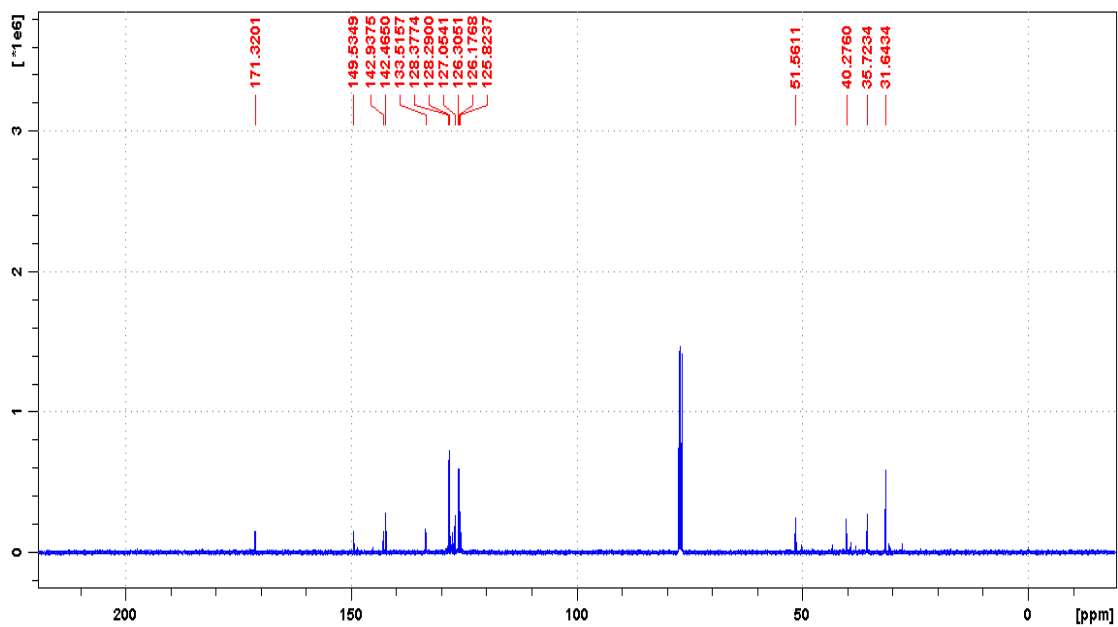

Supplement: c1cc15781g.pdf [file c1cc15781g.pdf]
